# Supplementary material for: PyBroP/base-promoted one-pot three-component sequential decarboxylative addition reaction of β-keto acids, isatylidene malononitriles and pyridine N -oxides
Source: Royal Society of Chemistry journal article supplement (doi:10.1039/d5ob01772f), 2026-01-01

# **PyBroP/base-promoted one-pot three-component sequential decarboxylative addition reaction of $\beta$ -keto acids, isatylidene malononitriles and pyridine *N*-oxides**

Fuzhong Han,<sup>\*, a, b</sup> Yingdong Na,<sup>a</sup> Lina Jia,<sup>a, b</sup> and Xiangping Hu<sup>\*, c</sup>

<sup>a</sup>*College of Chemistry and Chemical Engineering, Qiqihar University, Qiqihar 161006, China.*

<sup>b</sup>*Heilongjiang Provincial Key Laboratory of Catalytic Synthesis for Fine Chemicals, Qiqihar 161006, China*

<sup>c</sup>*Dalian Institute of Chemical Physics, Chinese Academy of Sciences, Dalian 116023, China.*

*E-mail: hanfuzhongchn@163.com*

## **Supporting Information**

# NMR Spectra

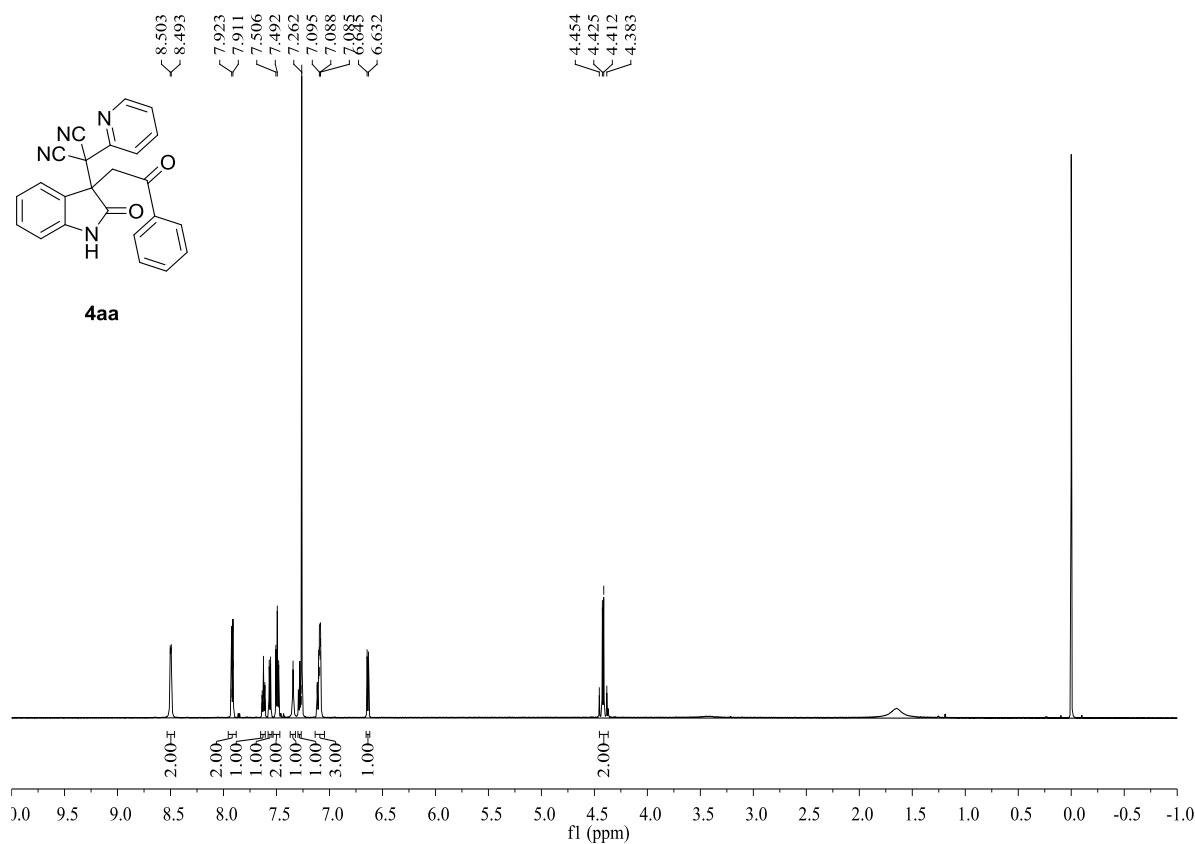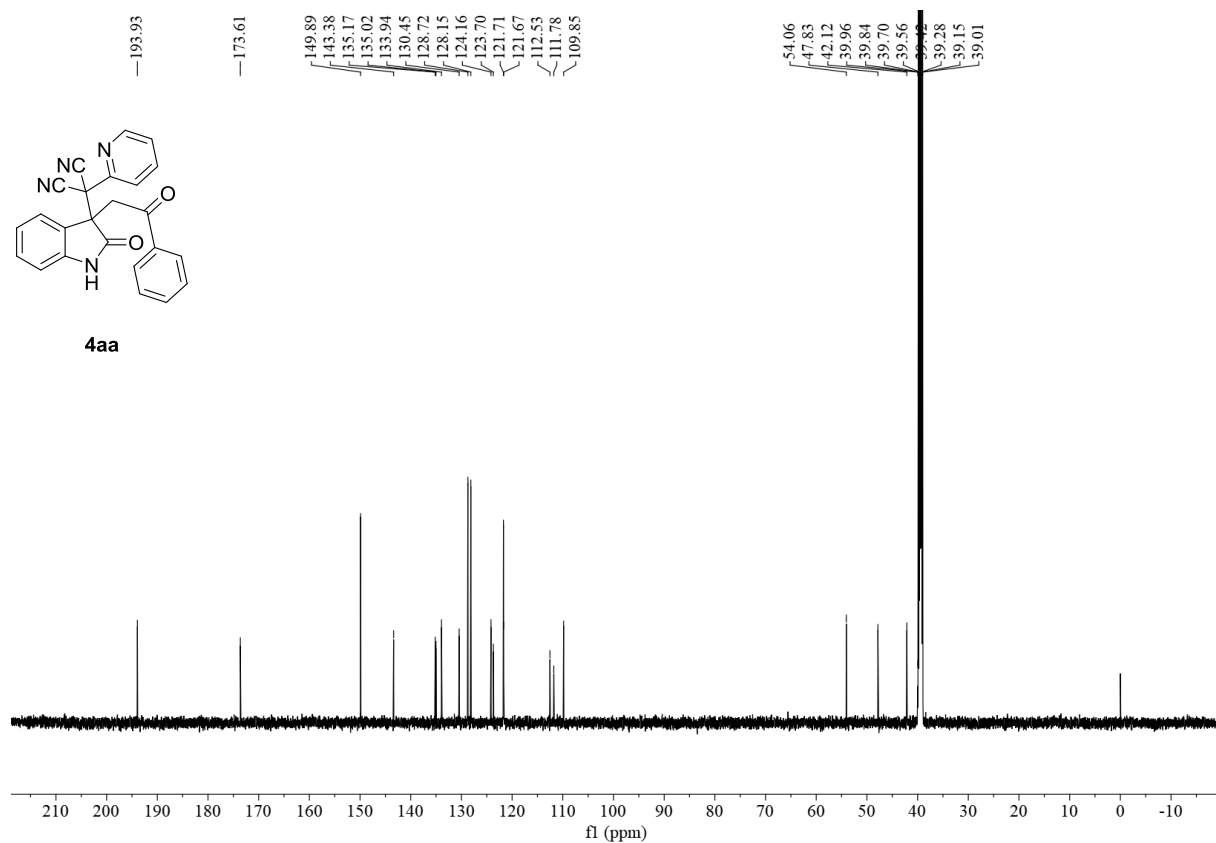

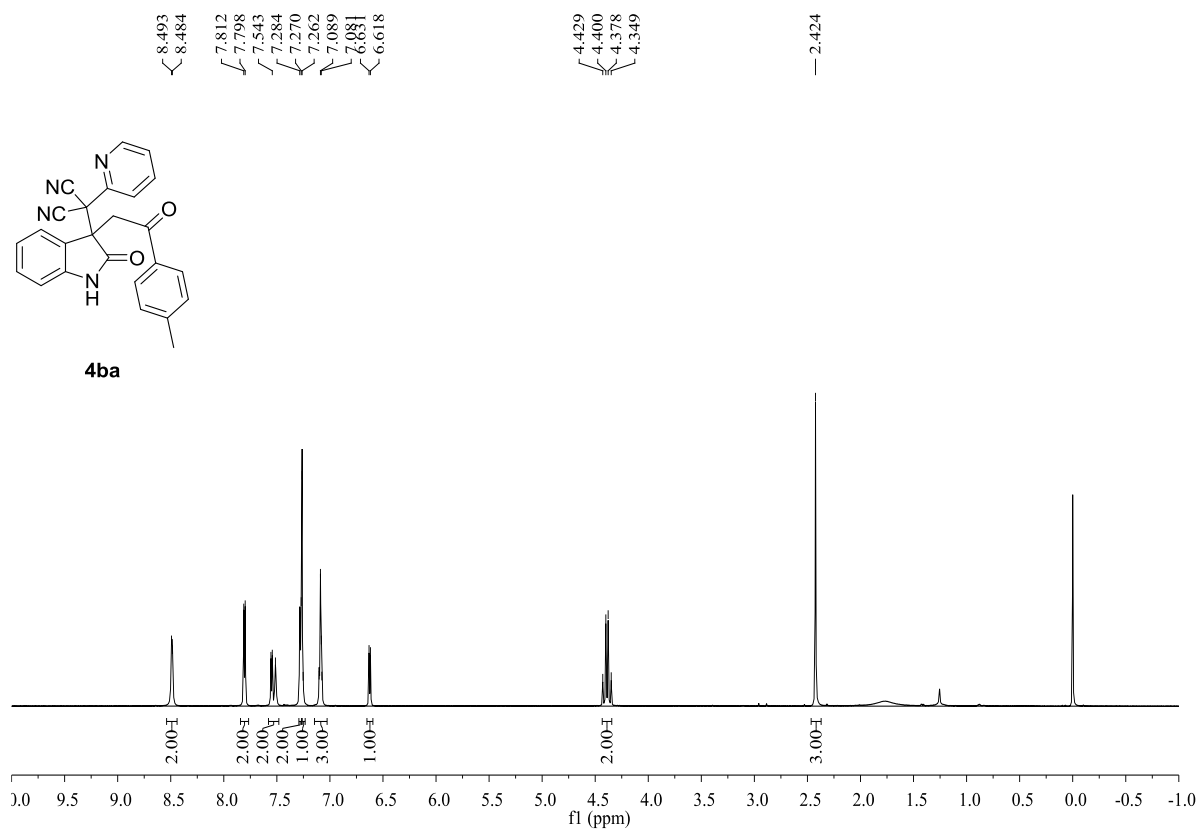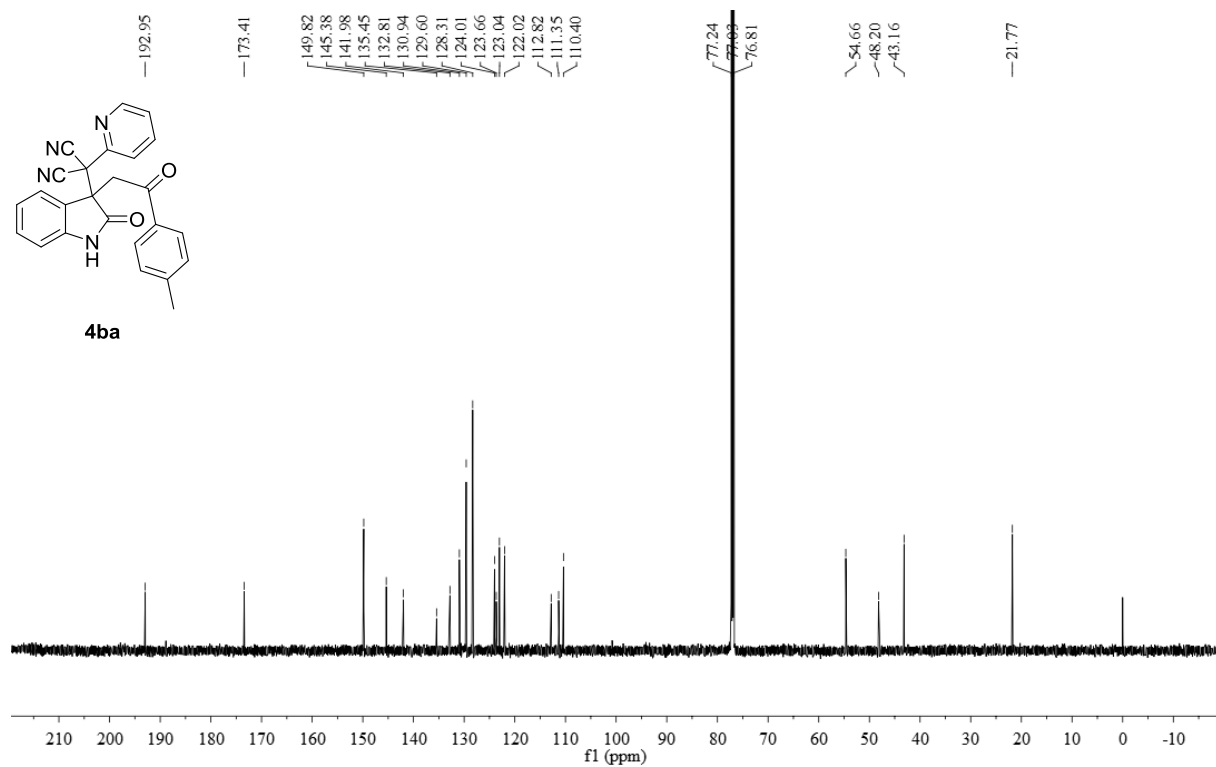

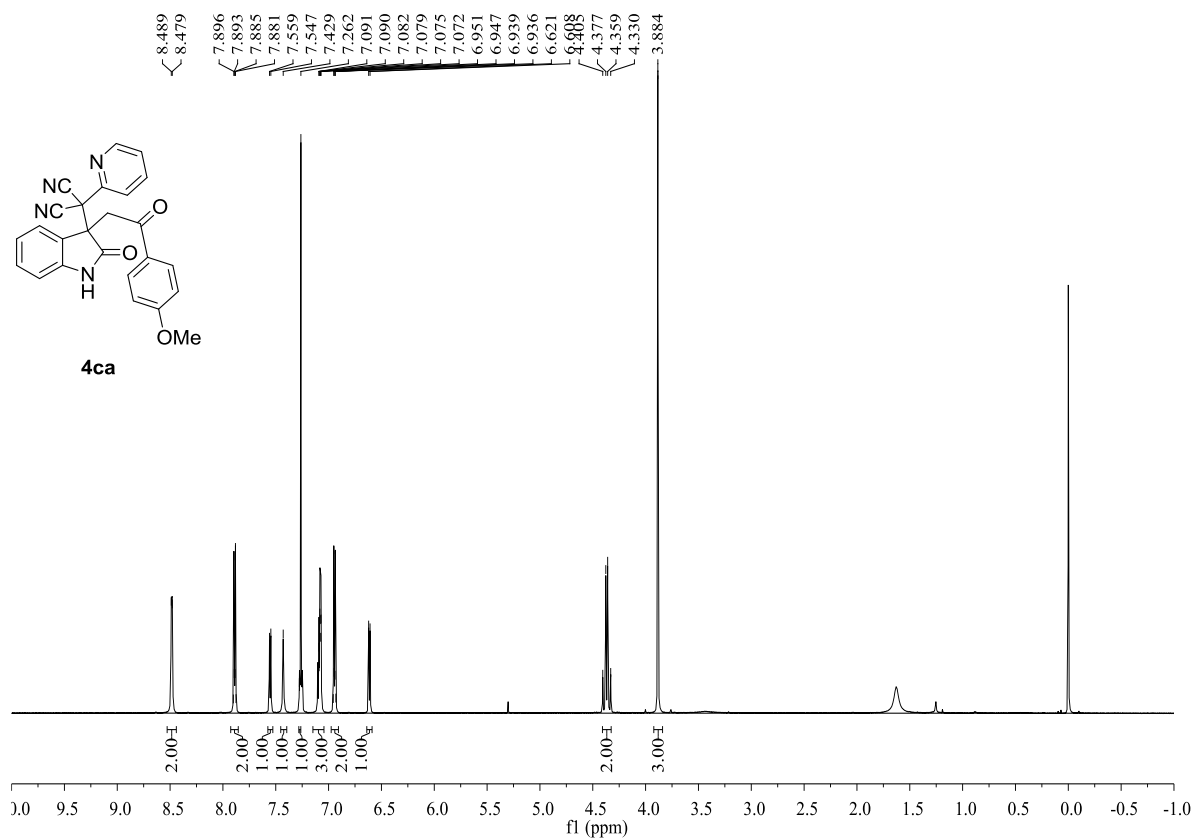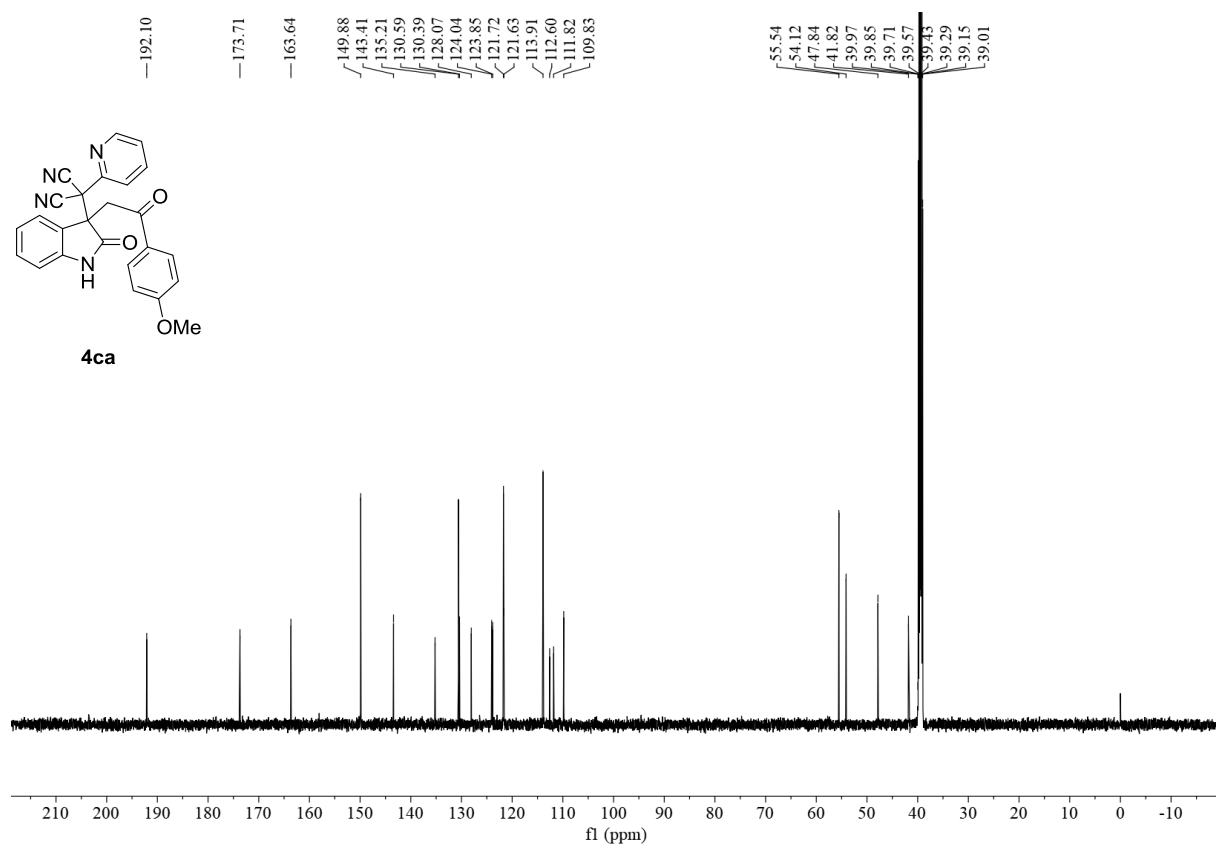

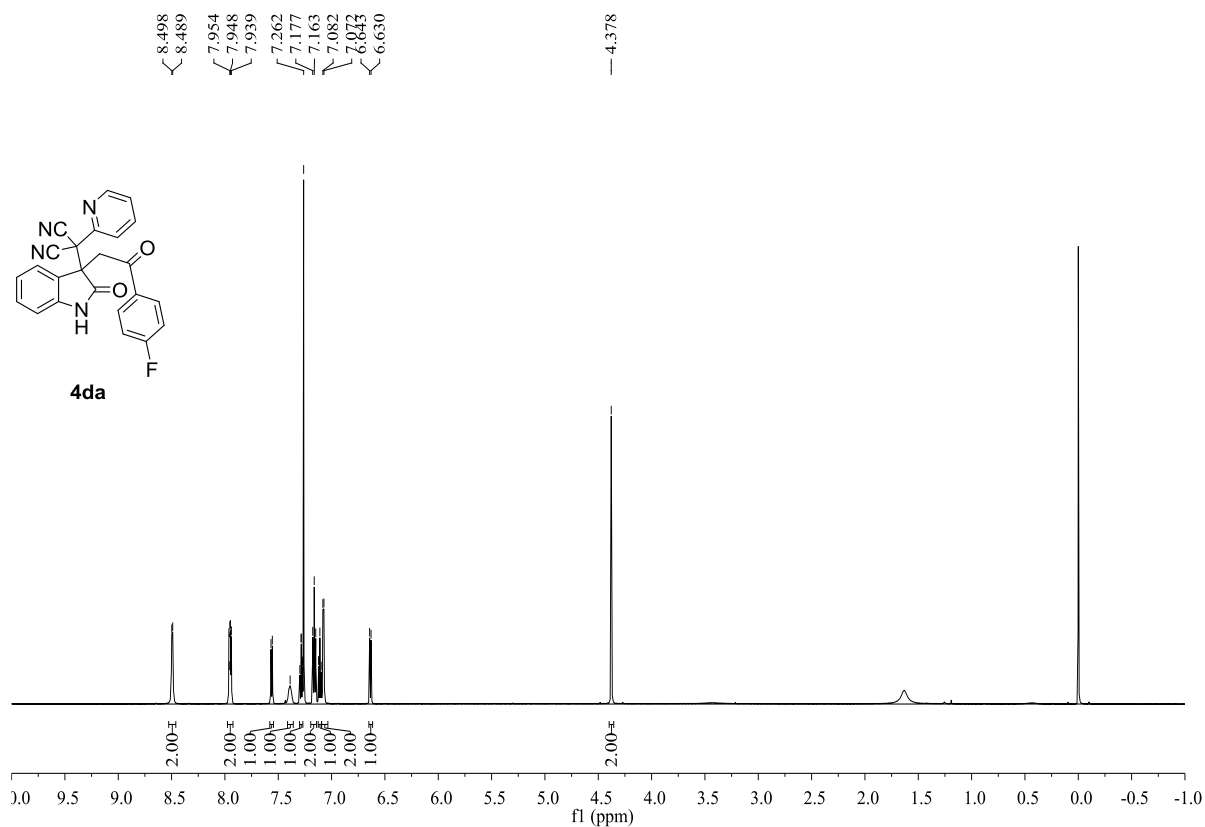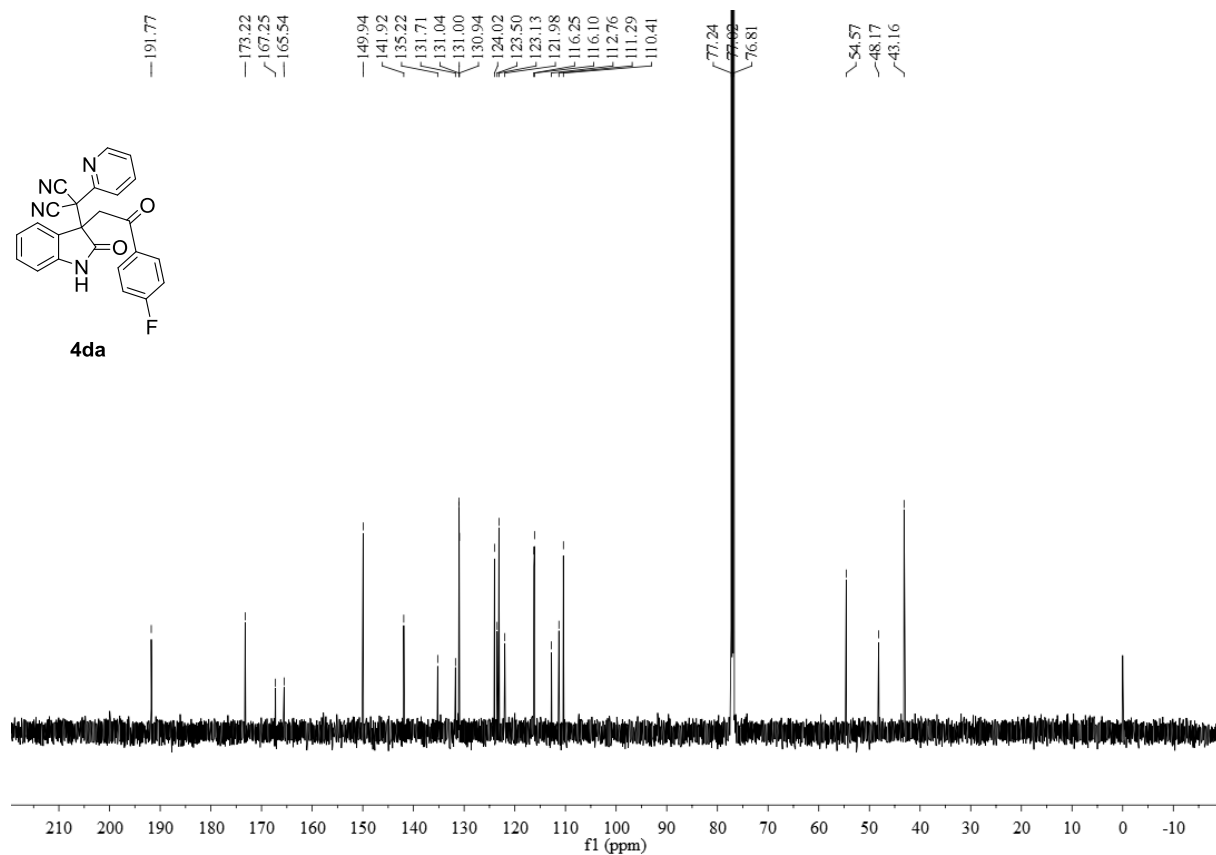

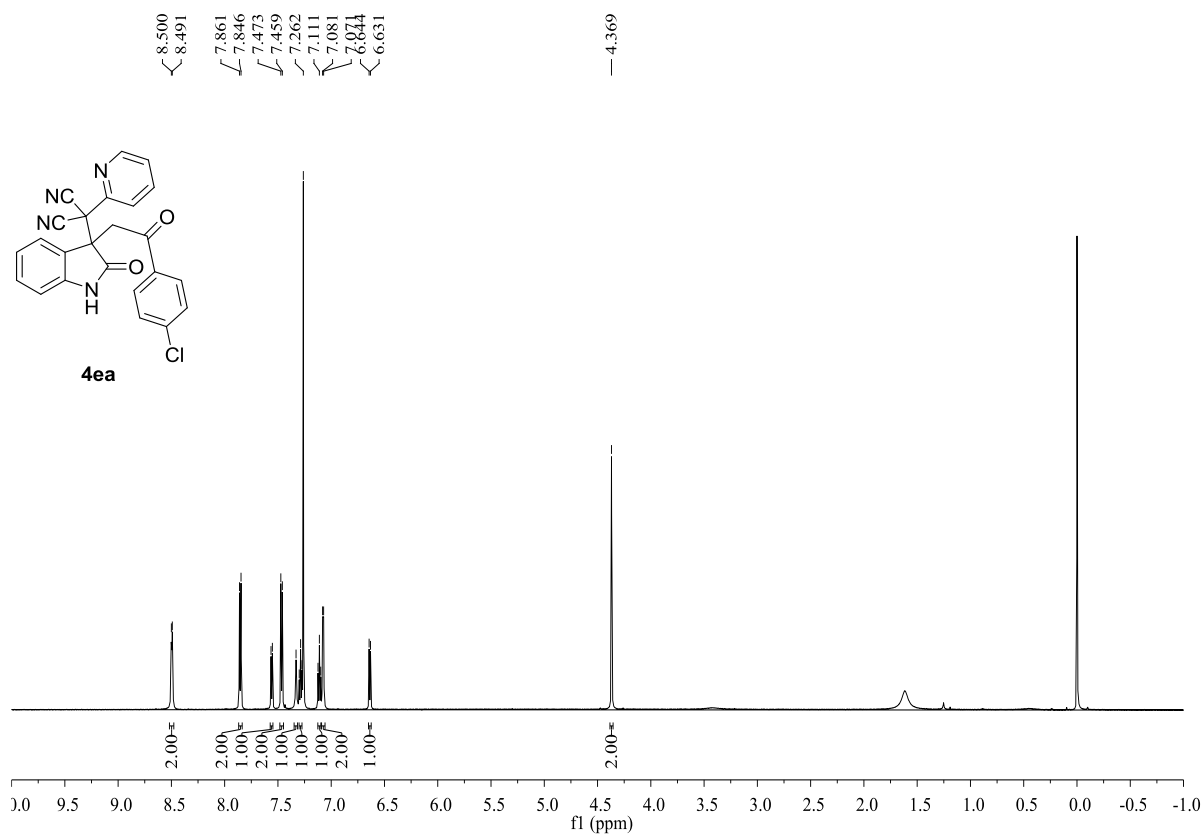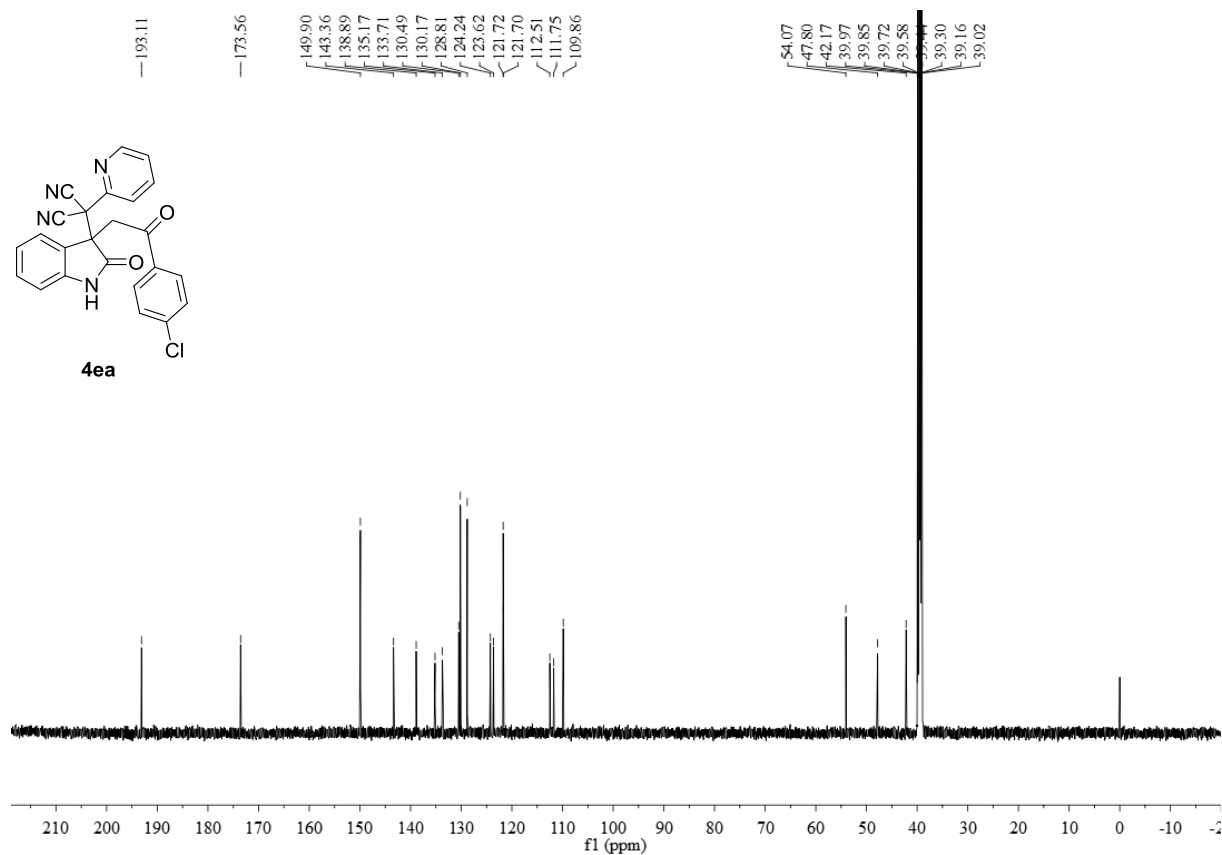

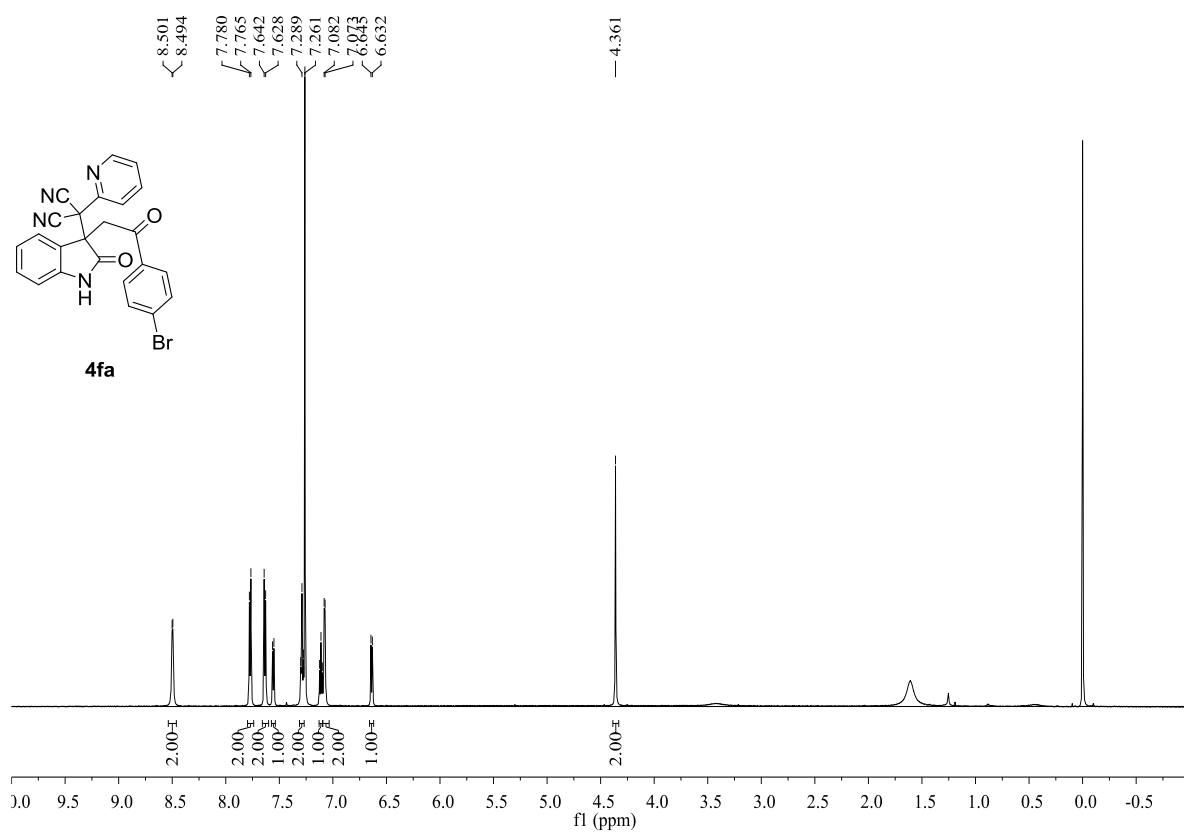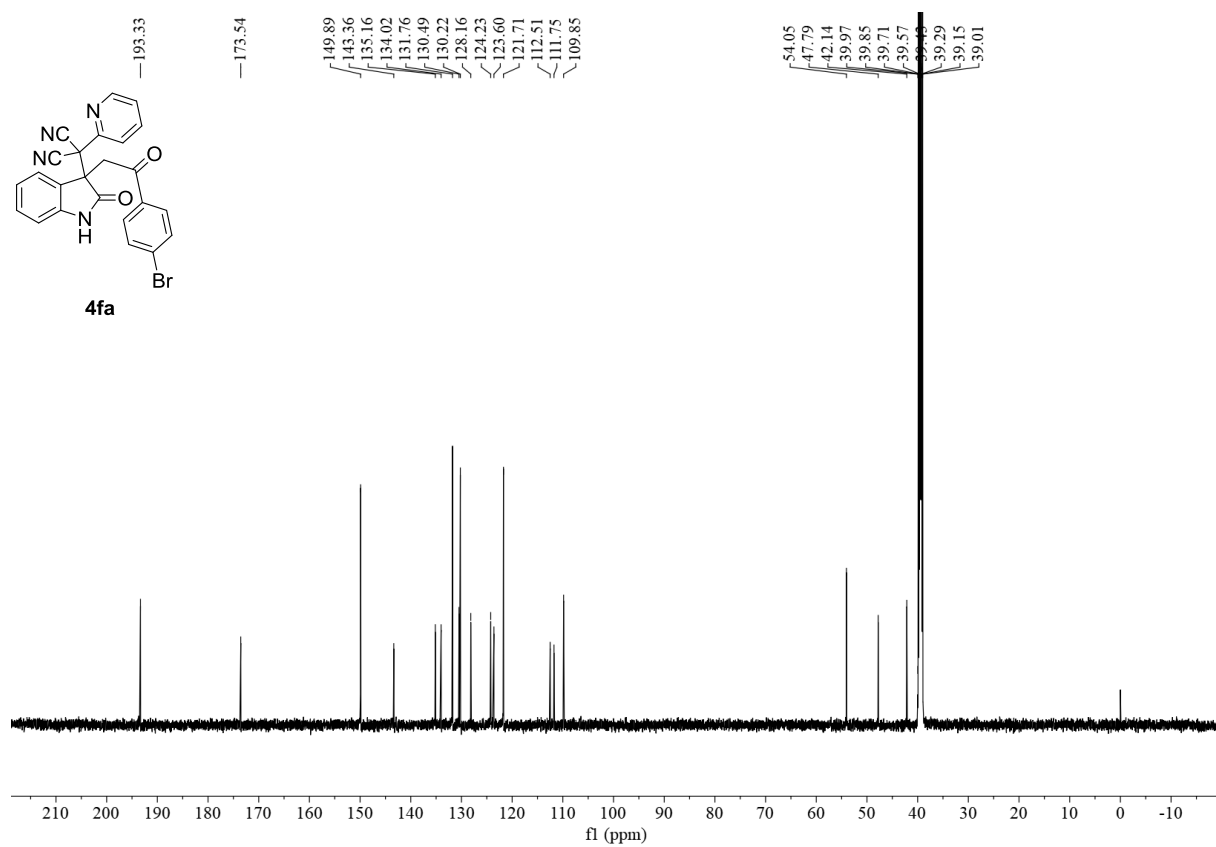

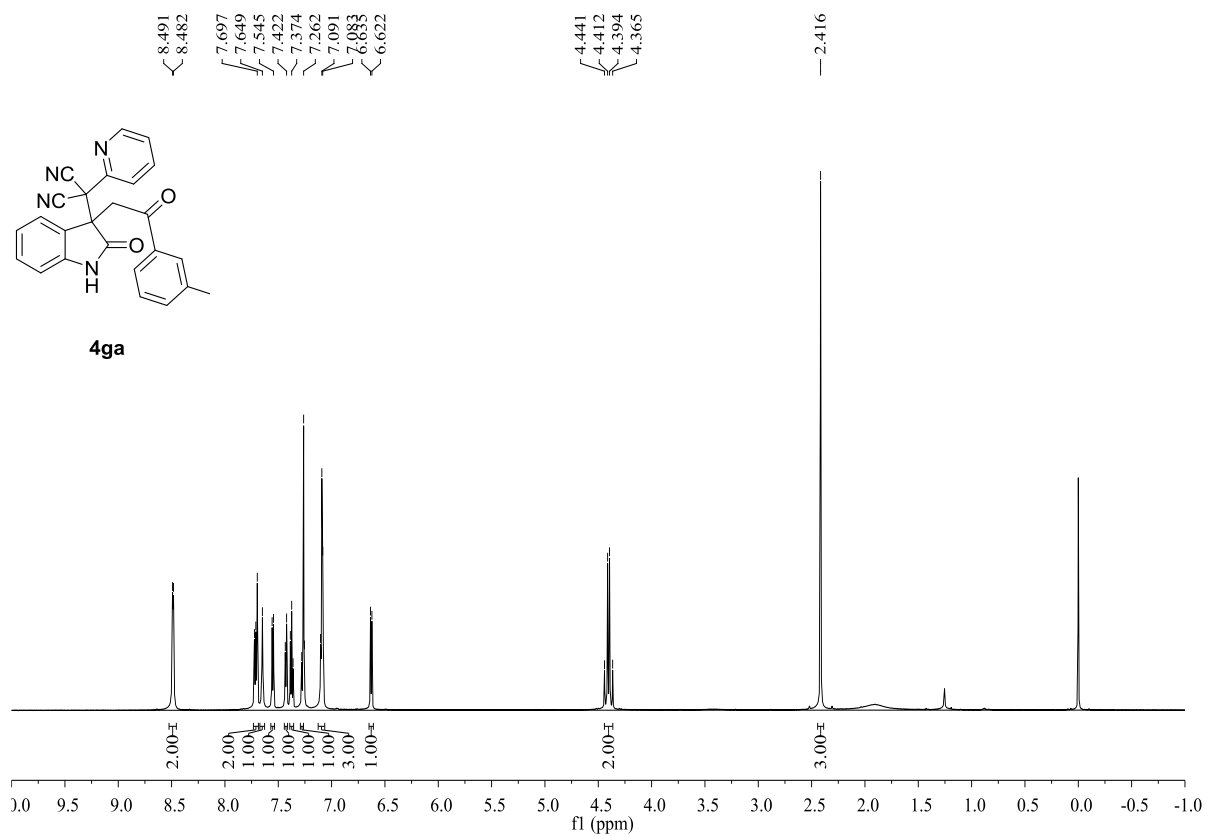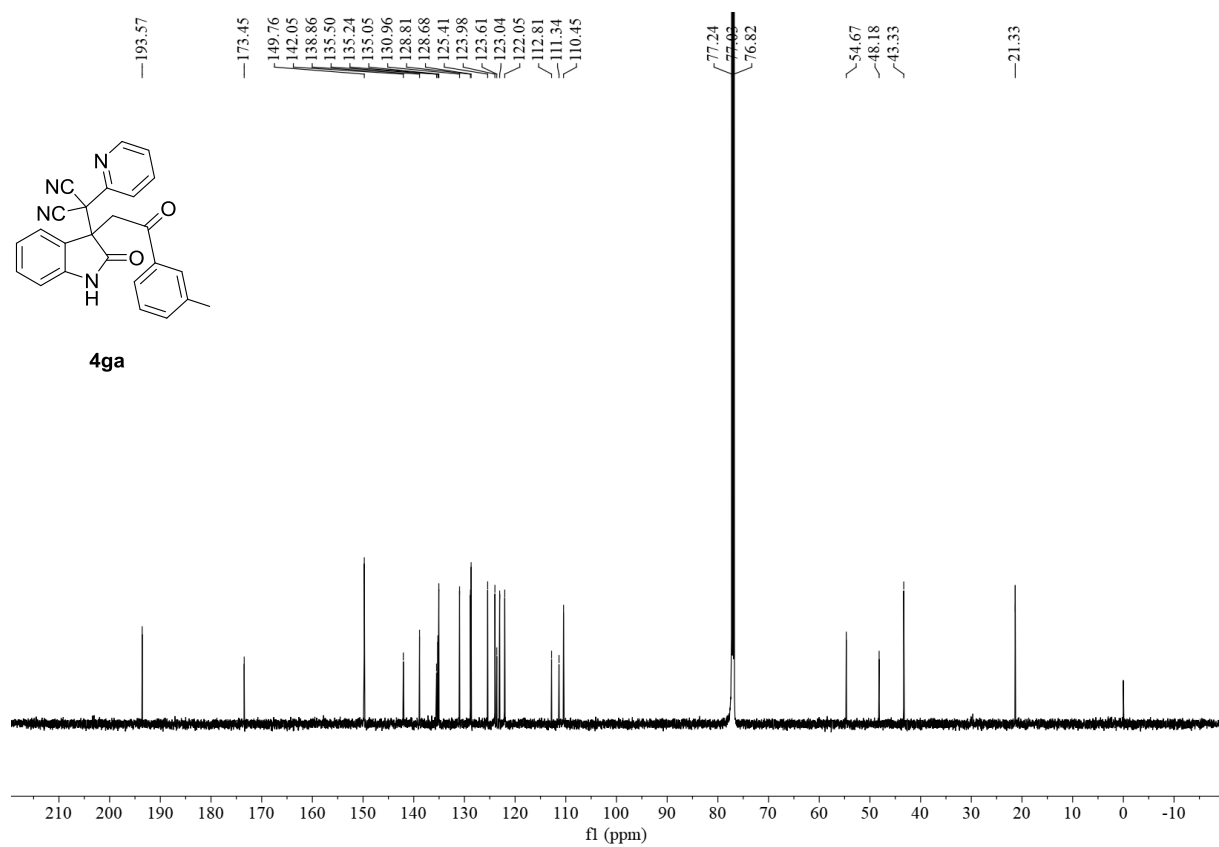



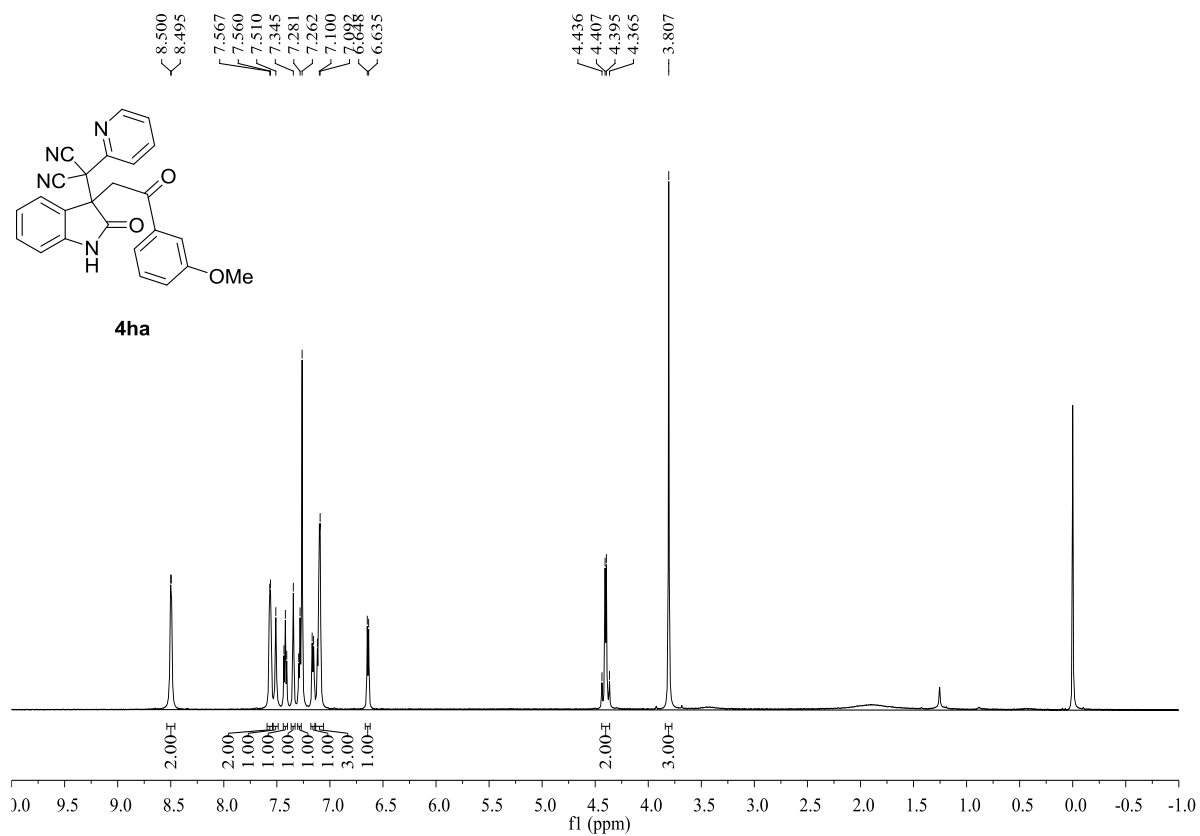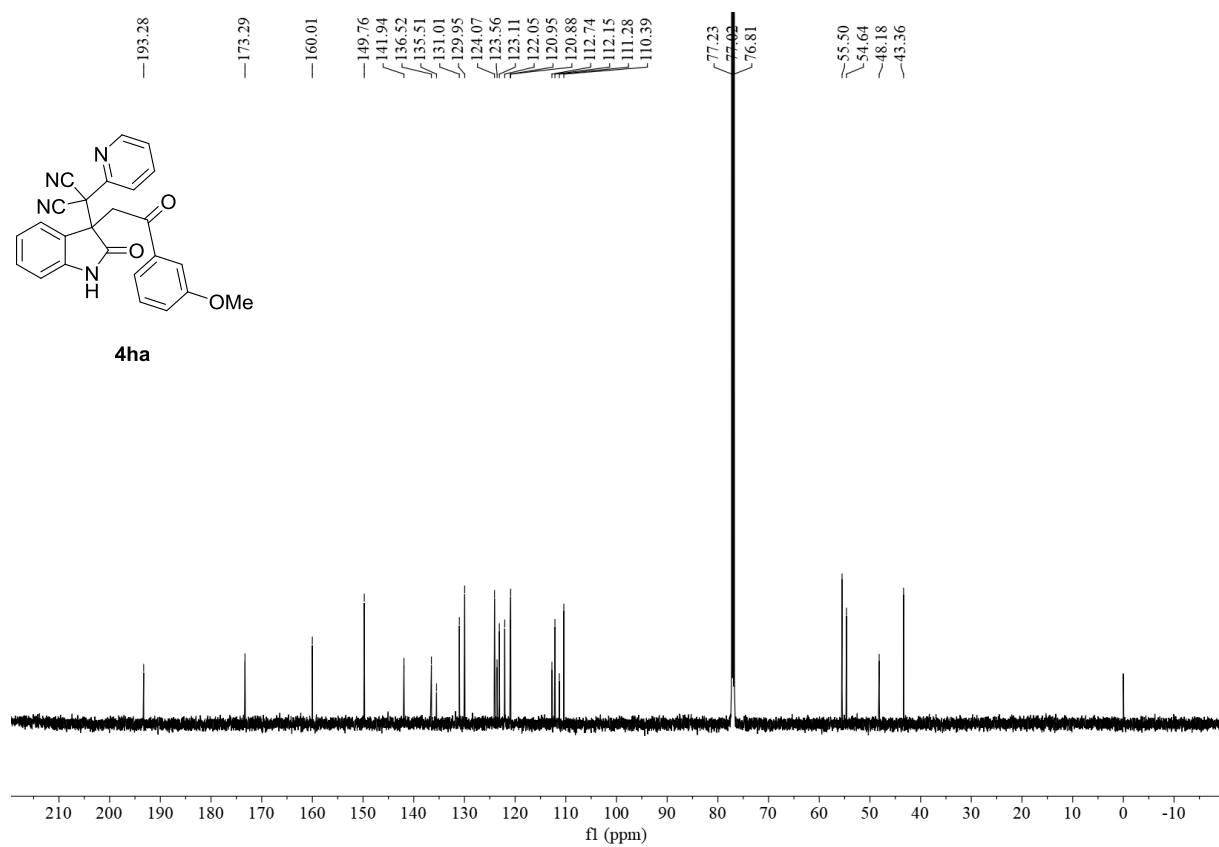

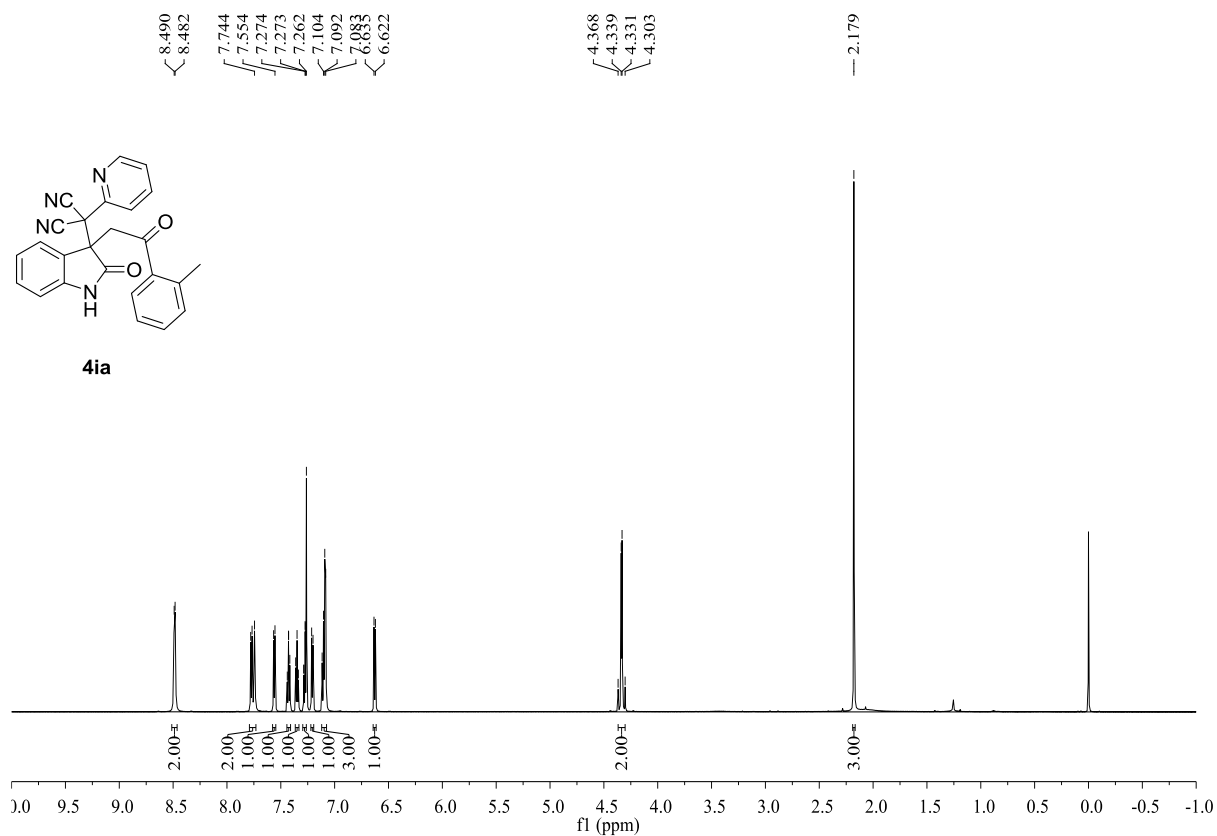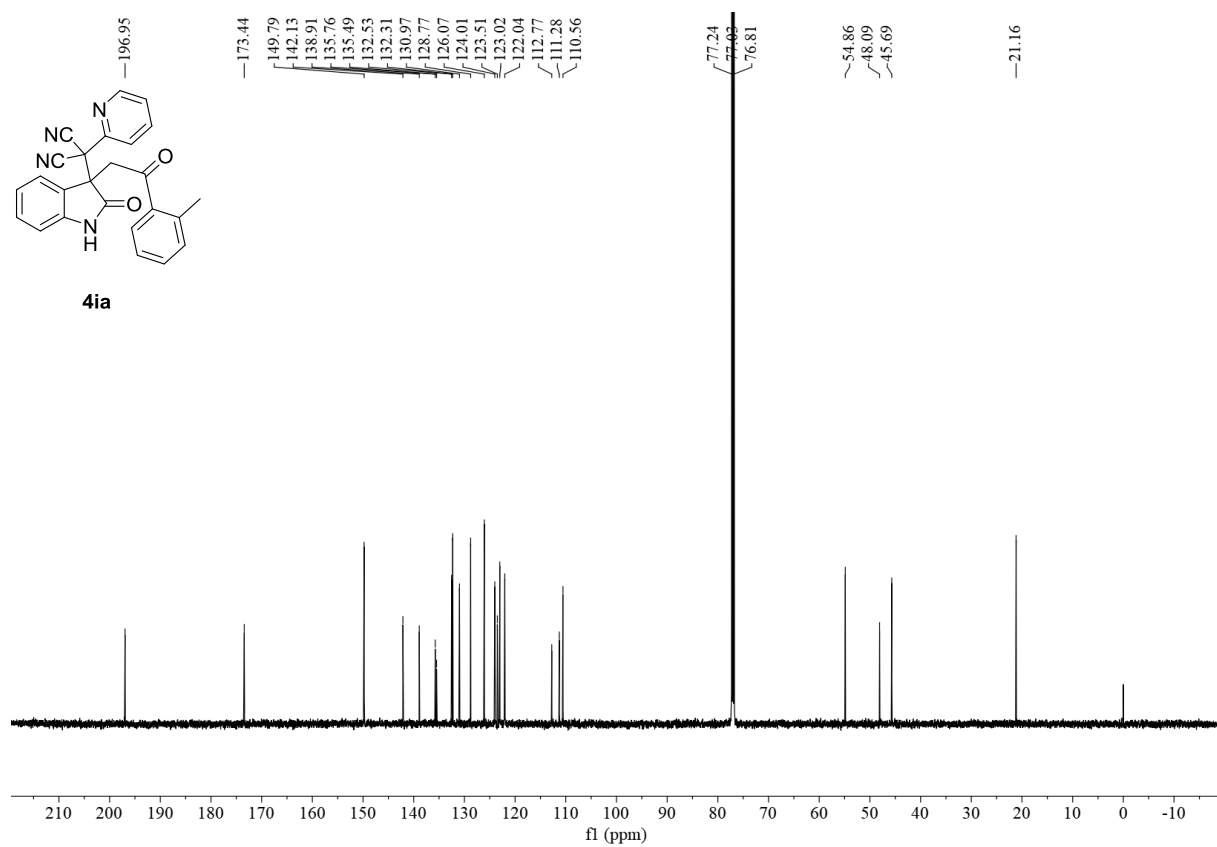

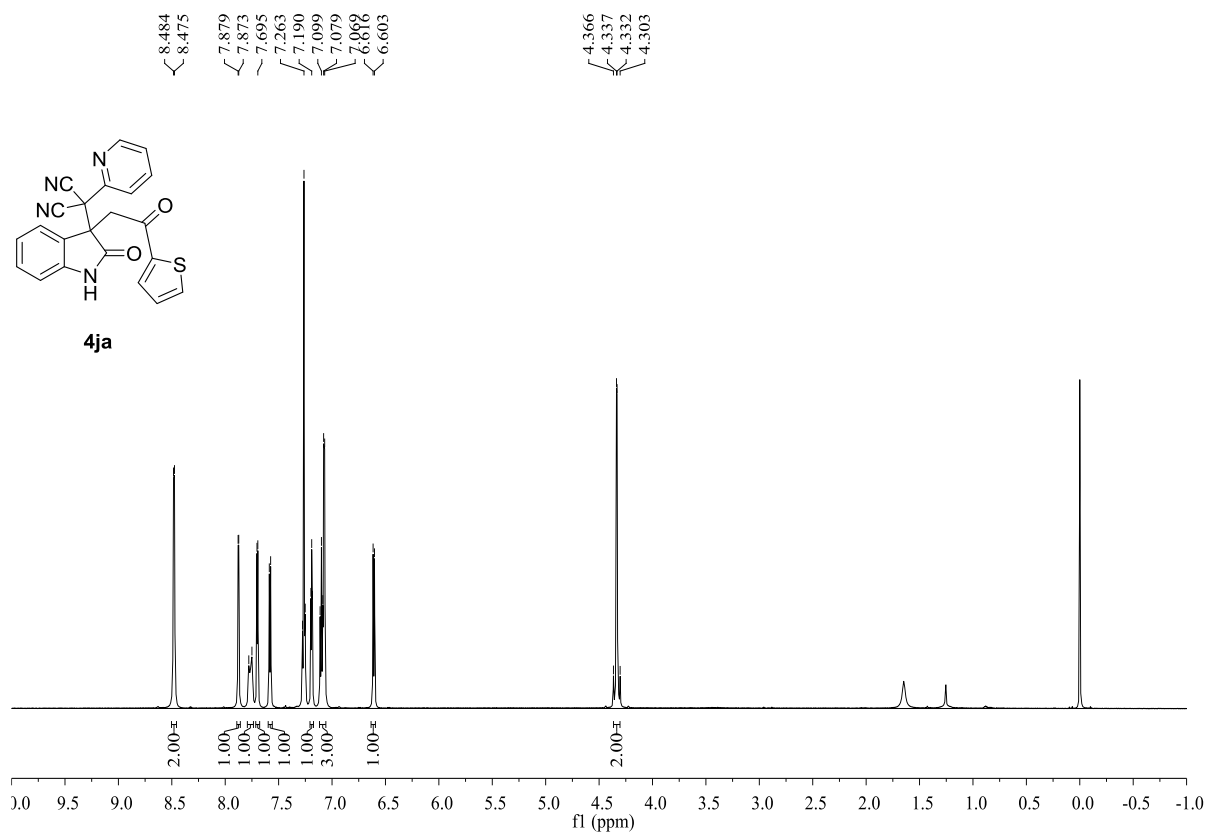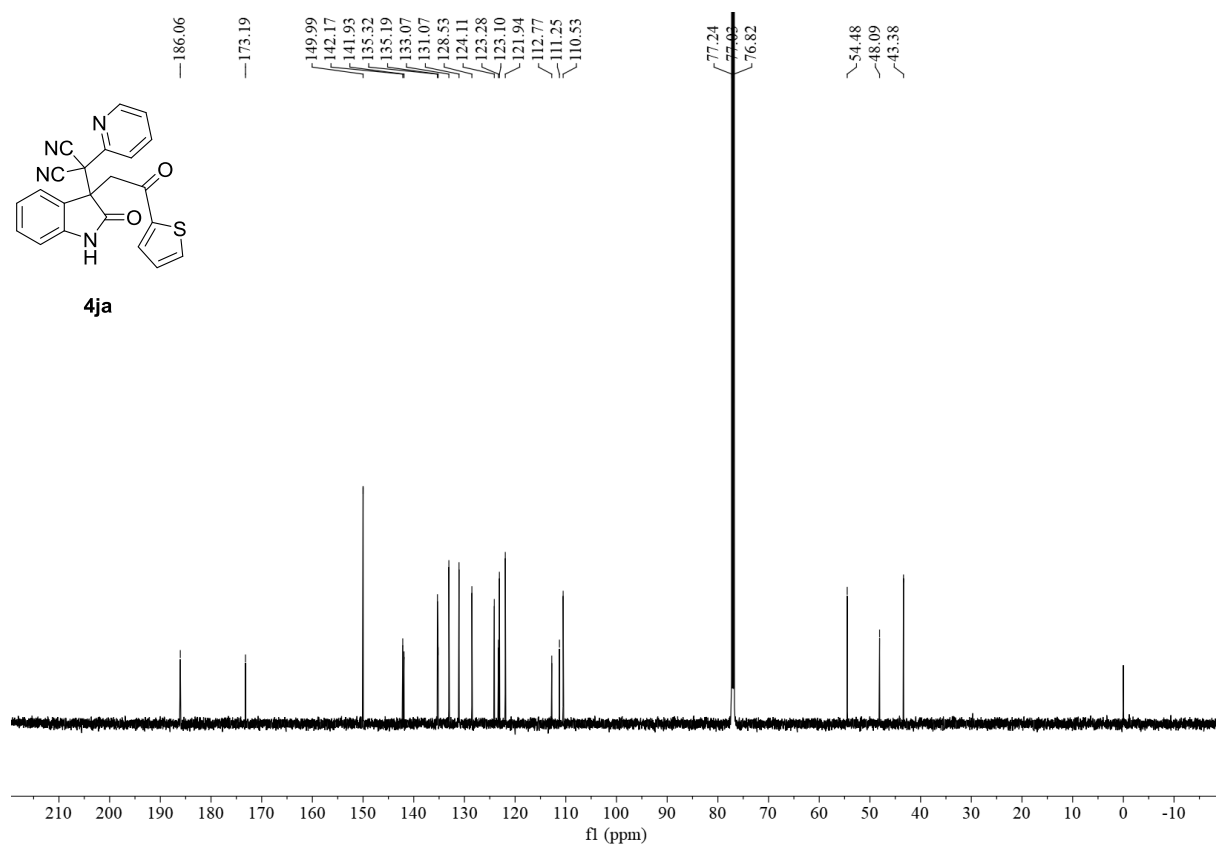

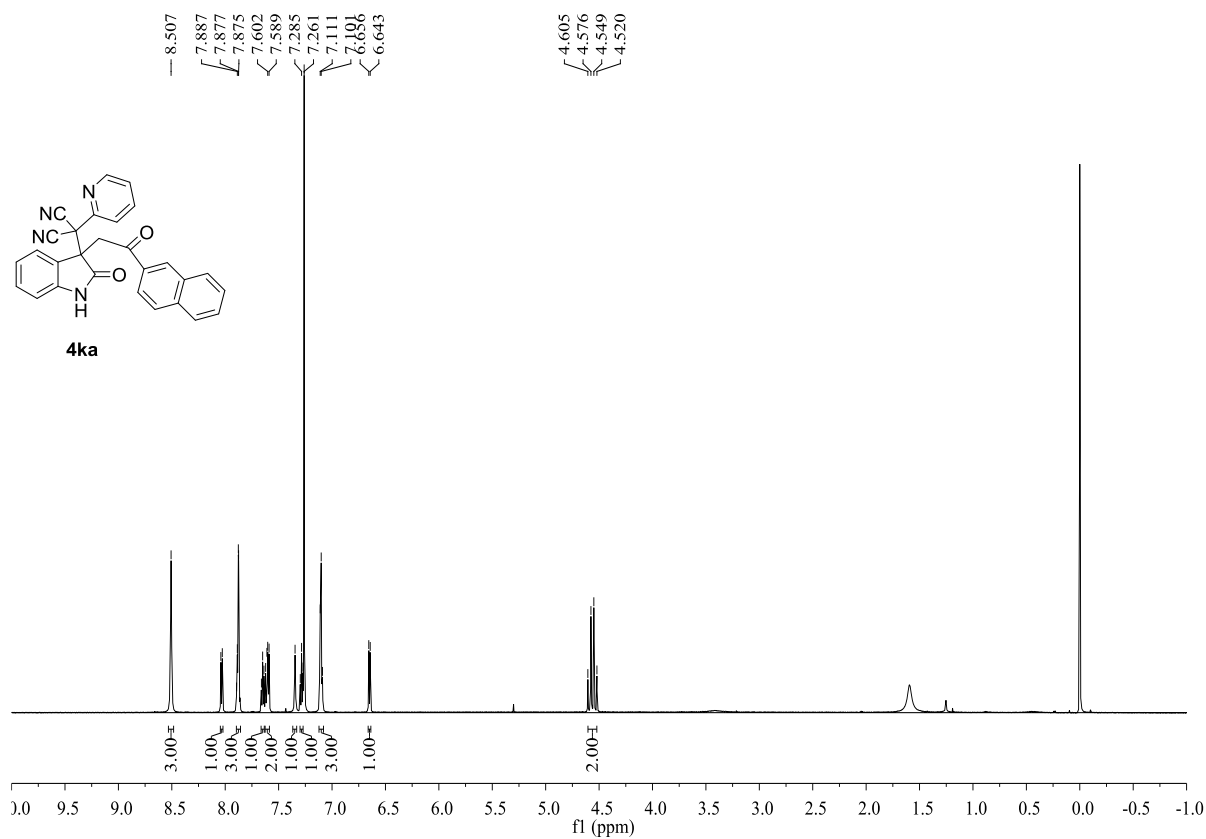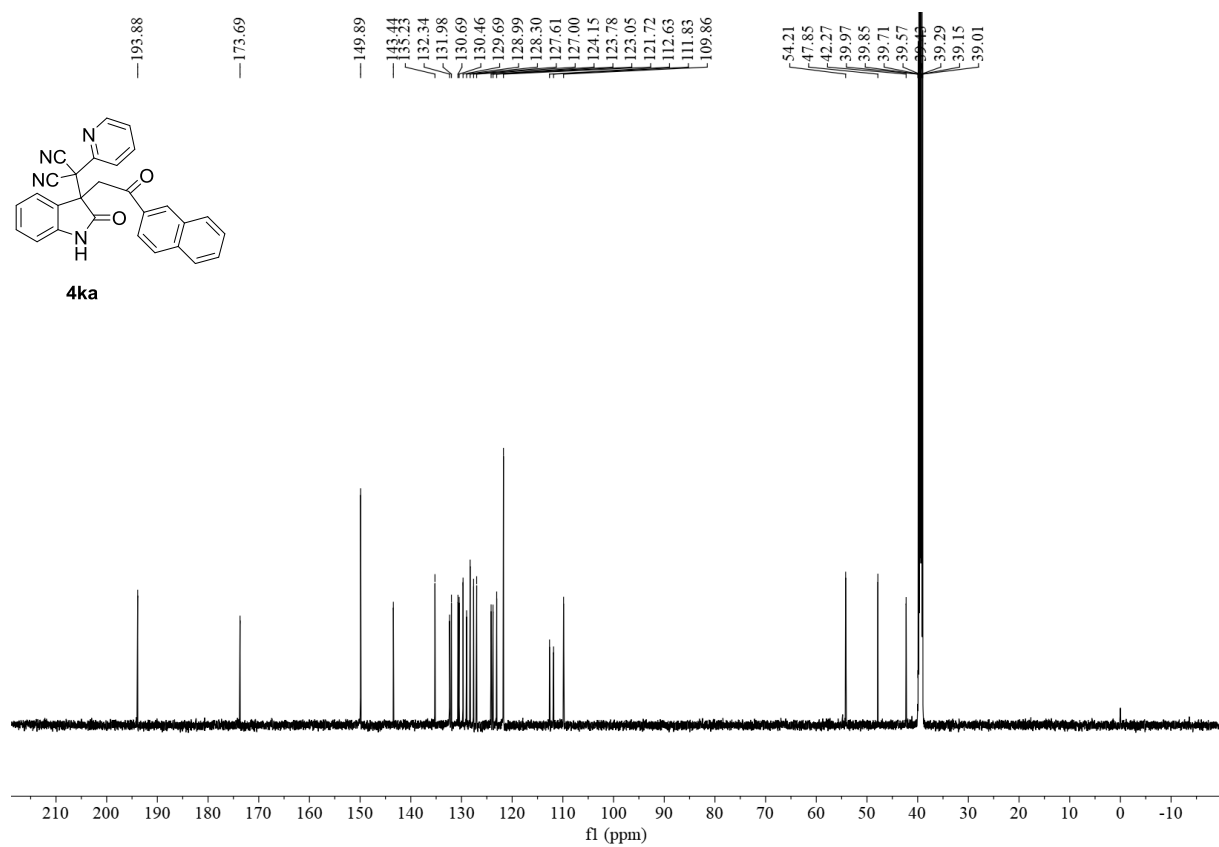

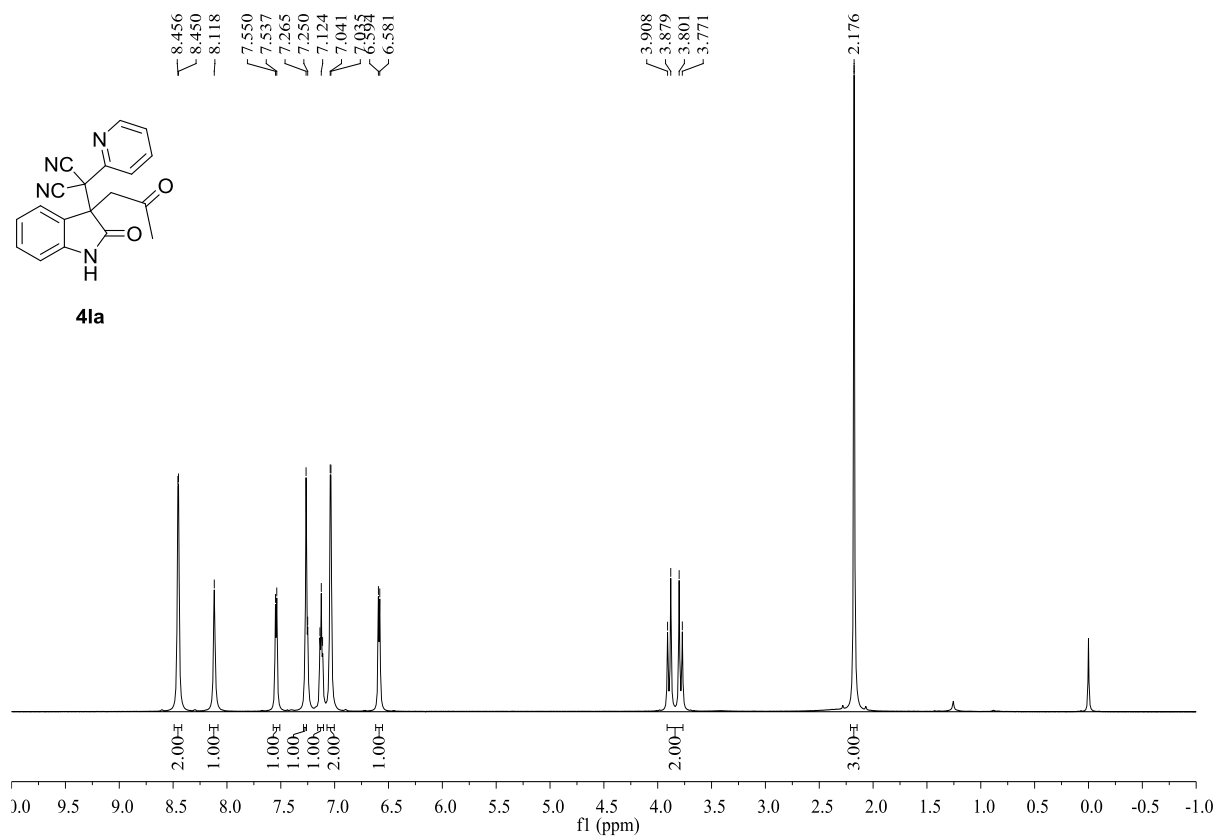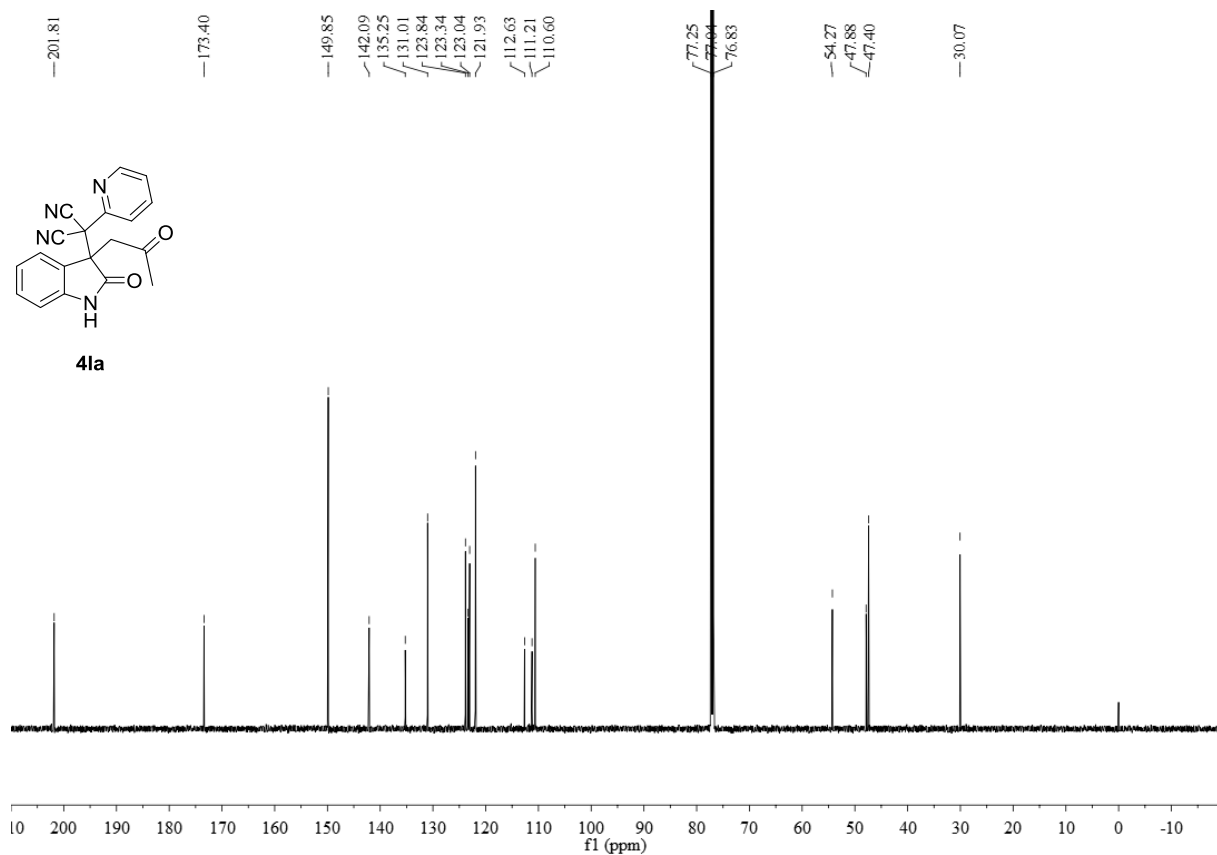

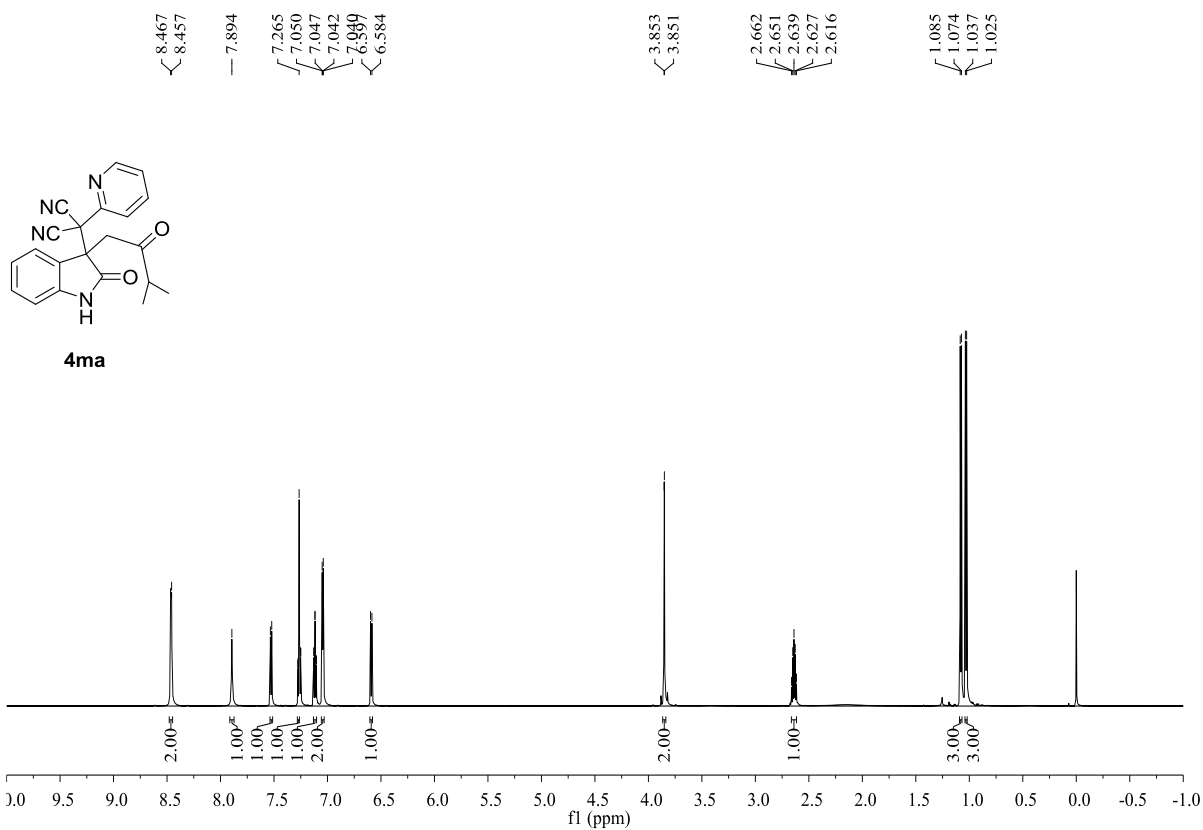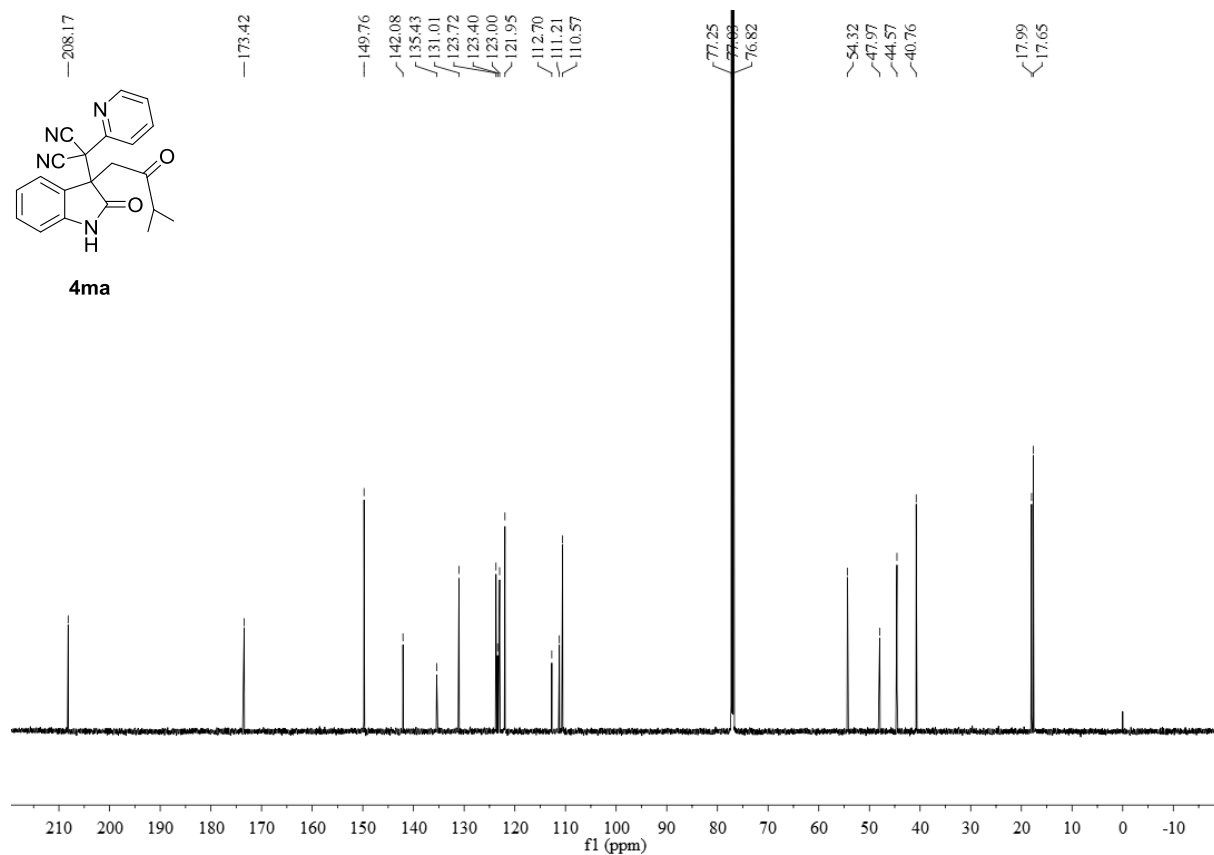

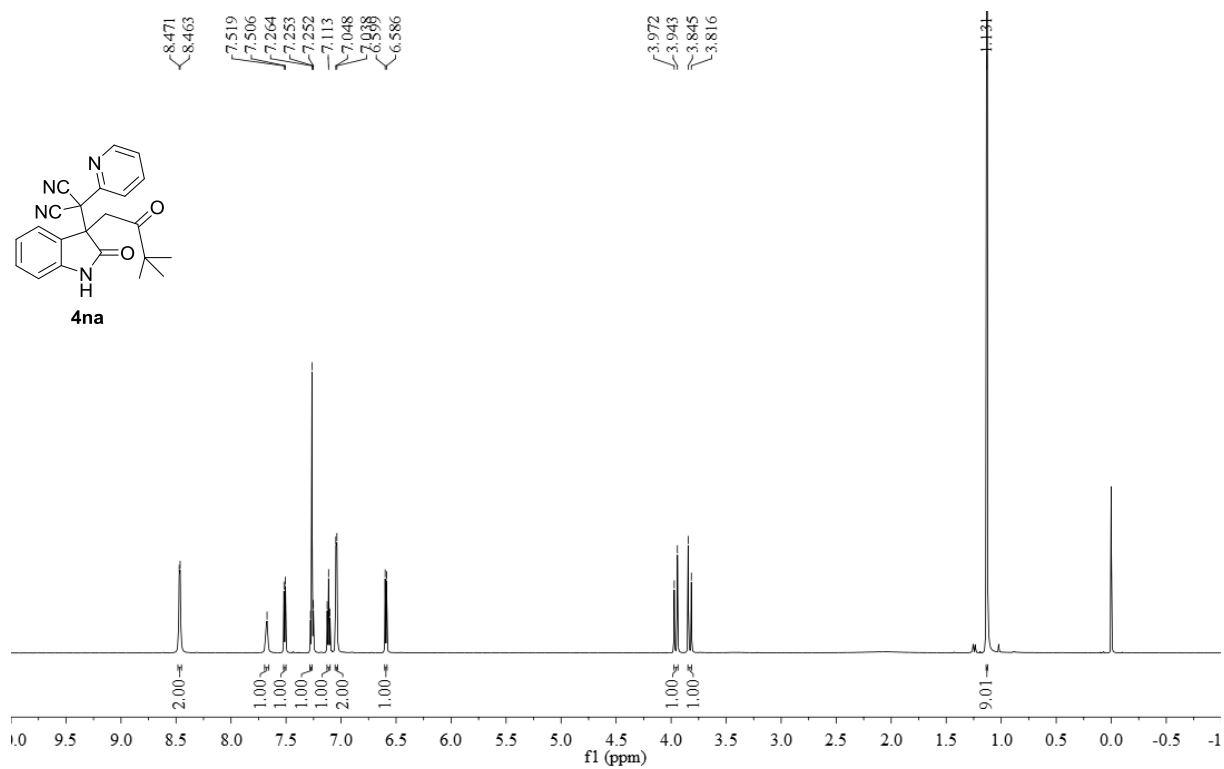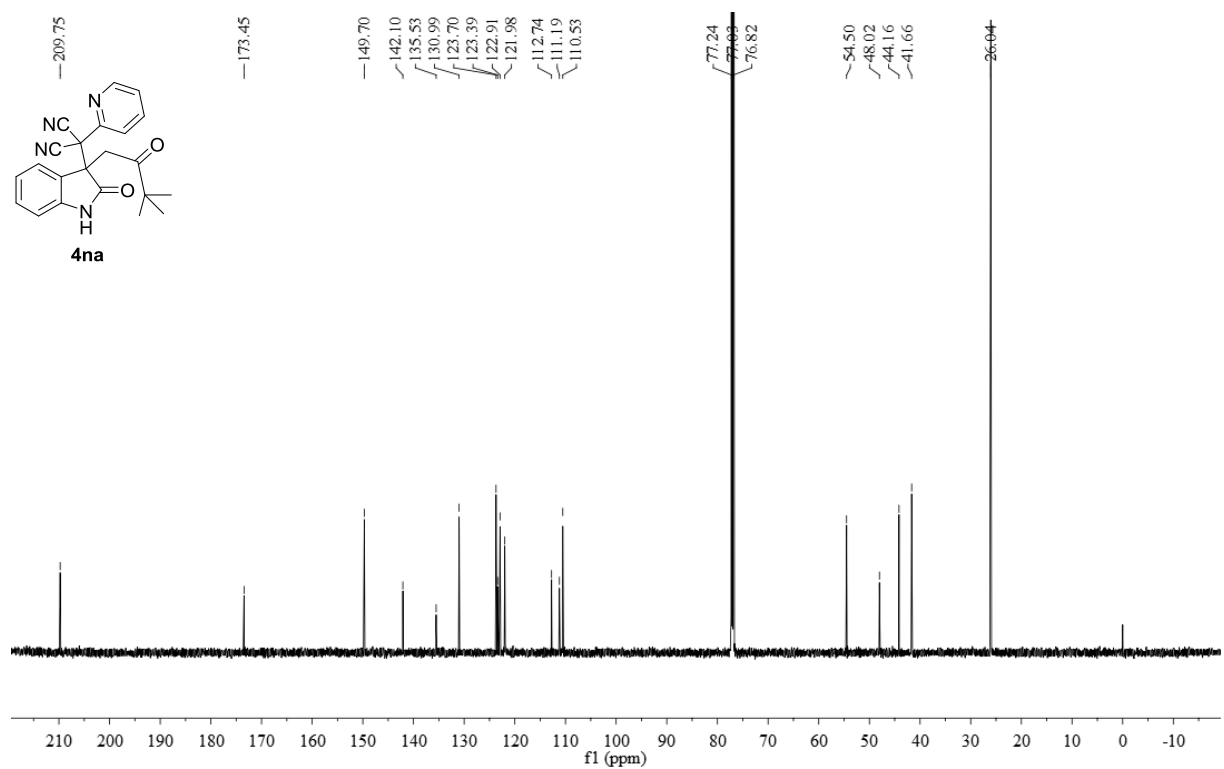

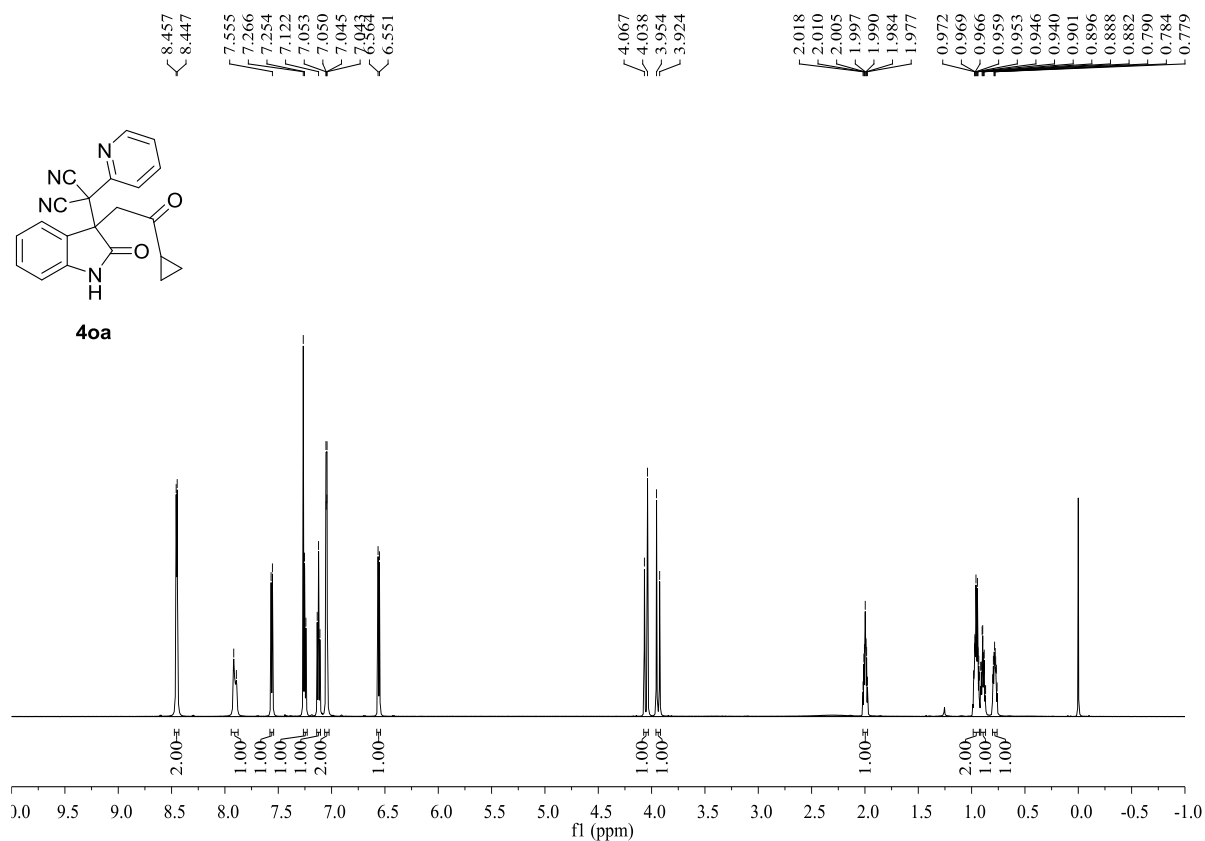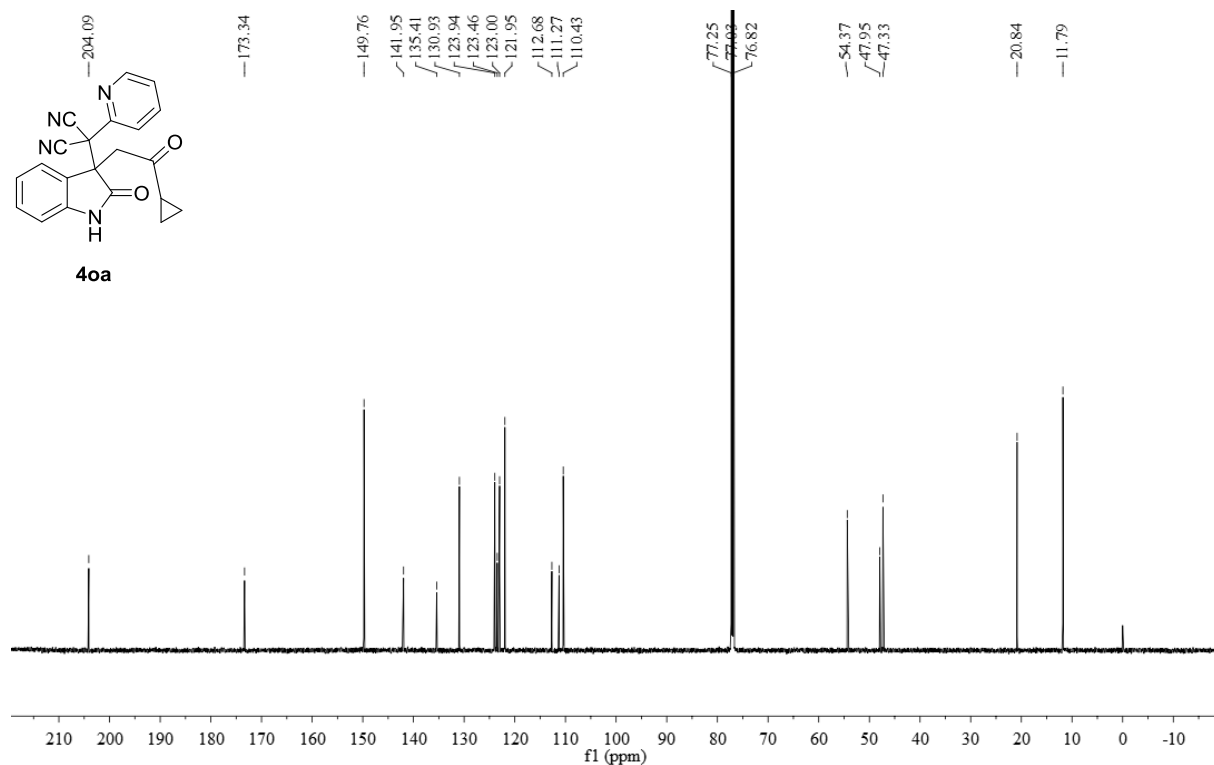



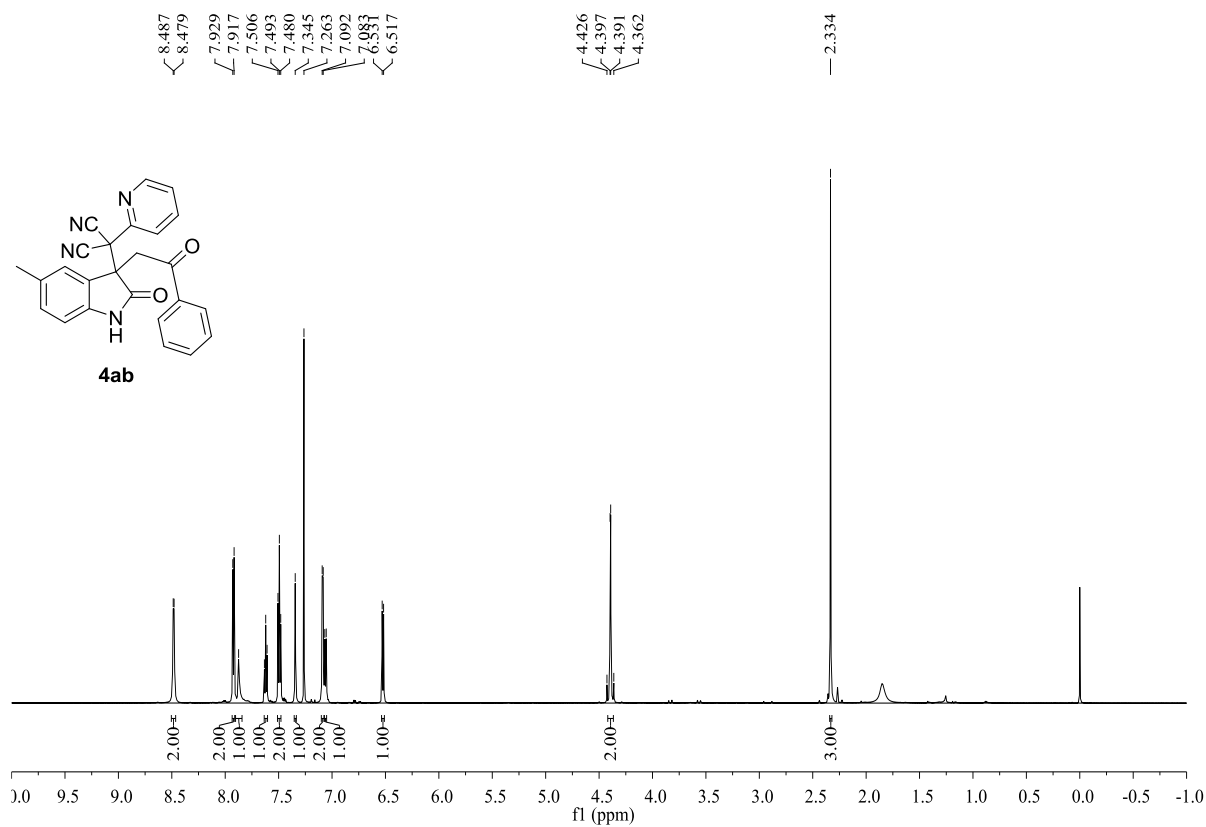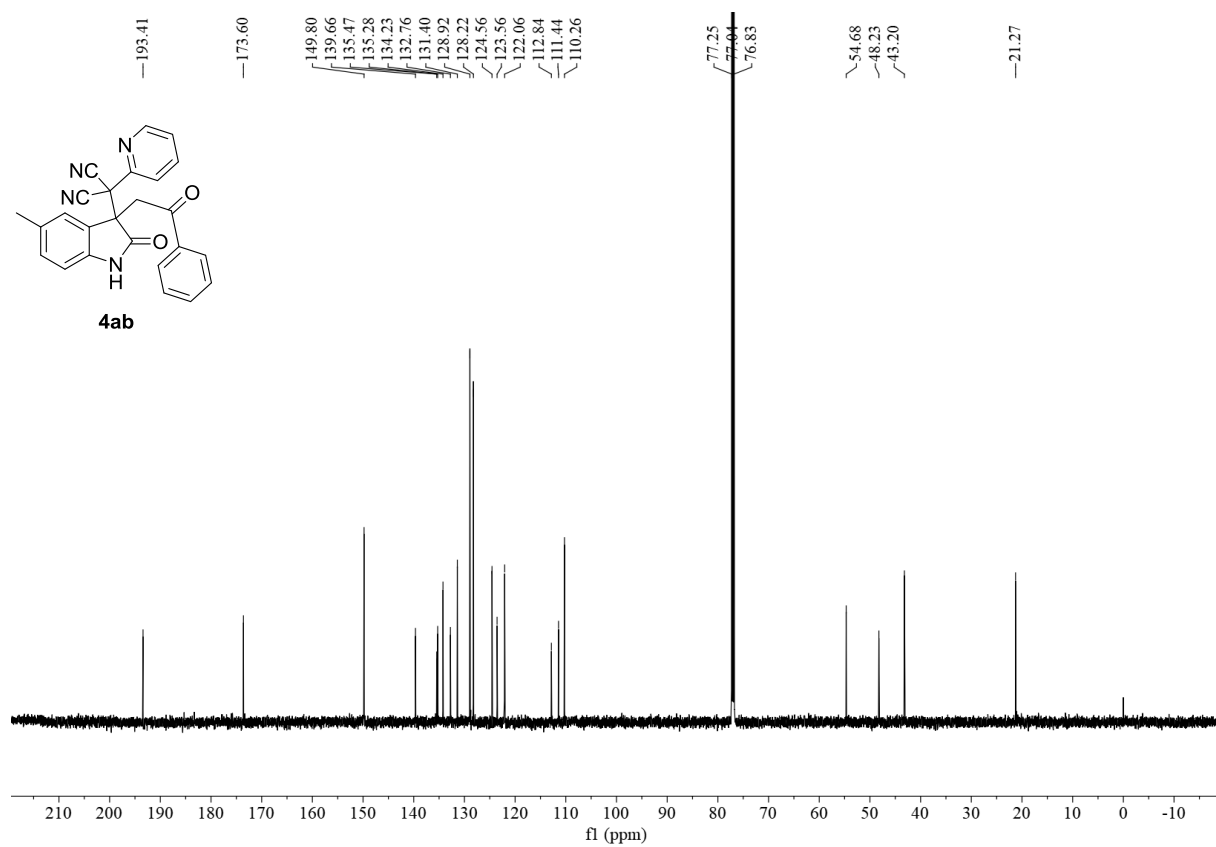

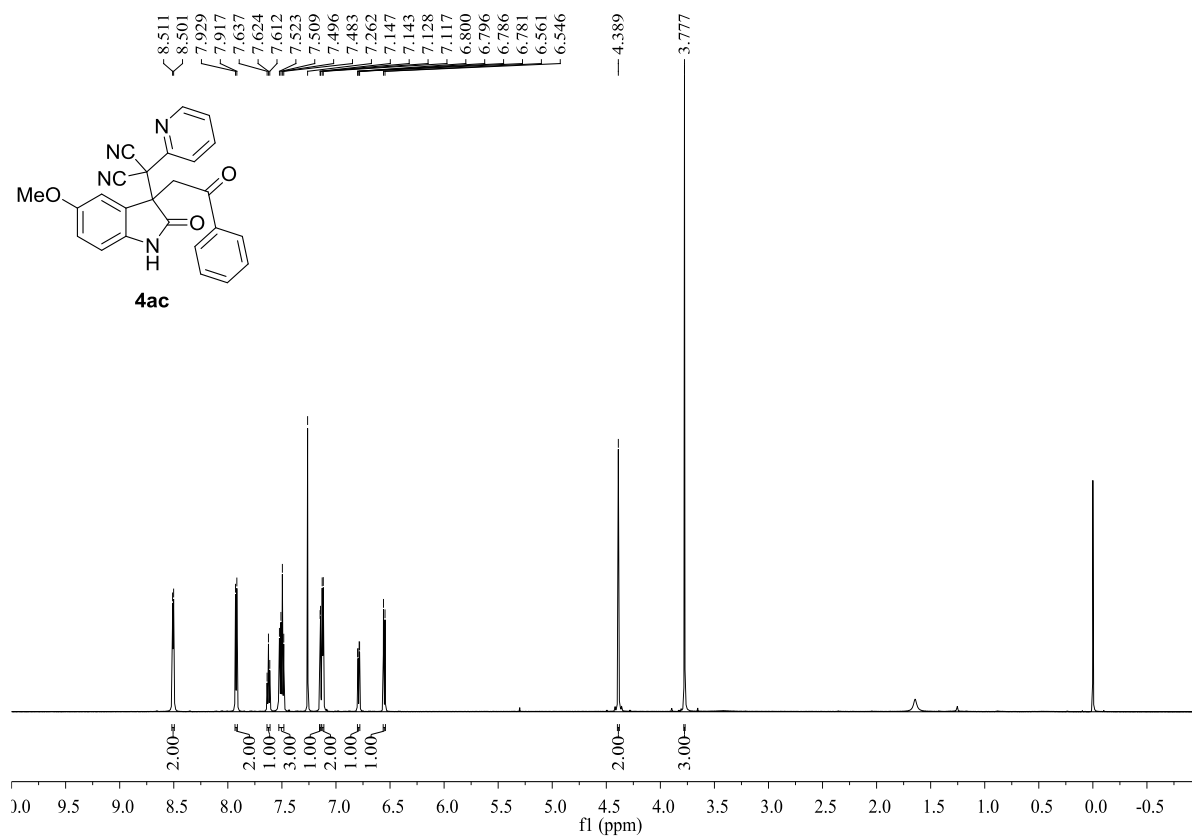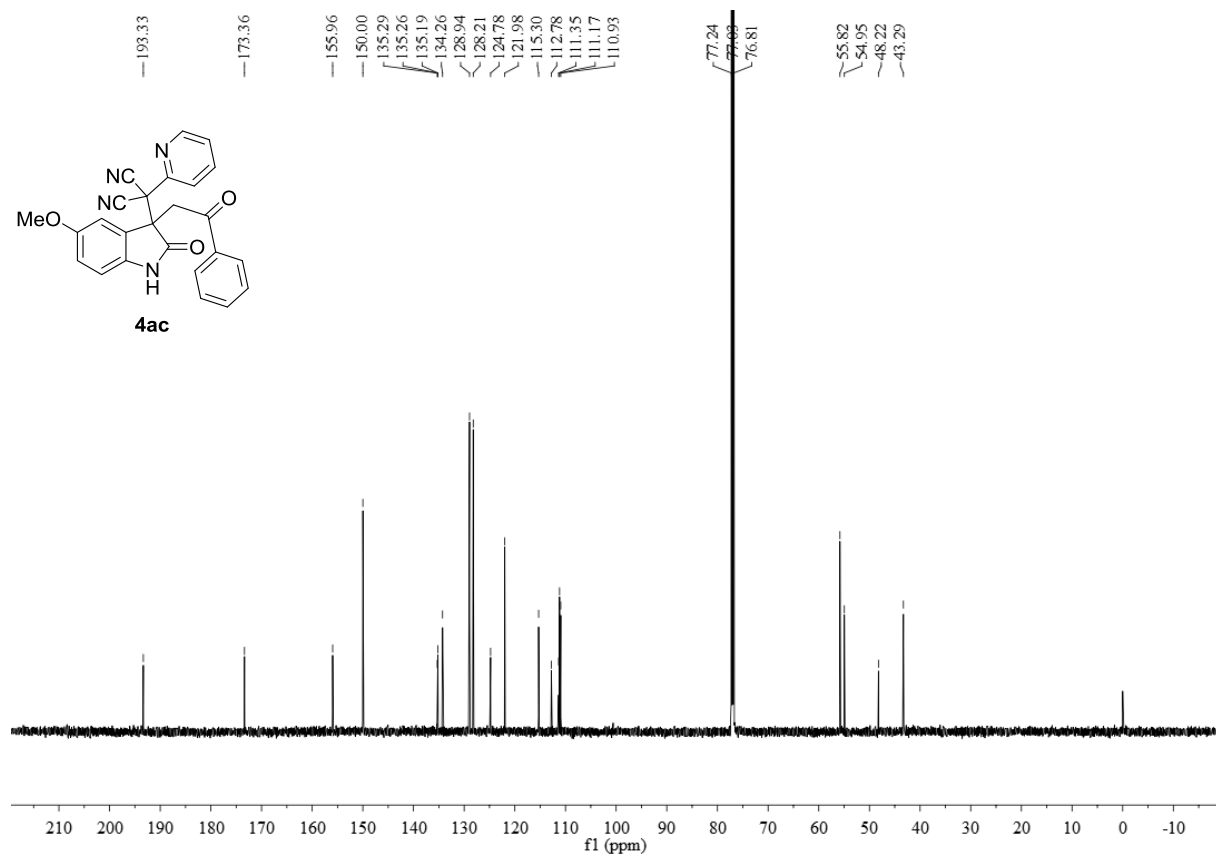

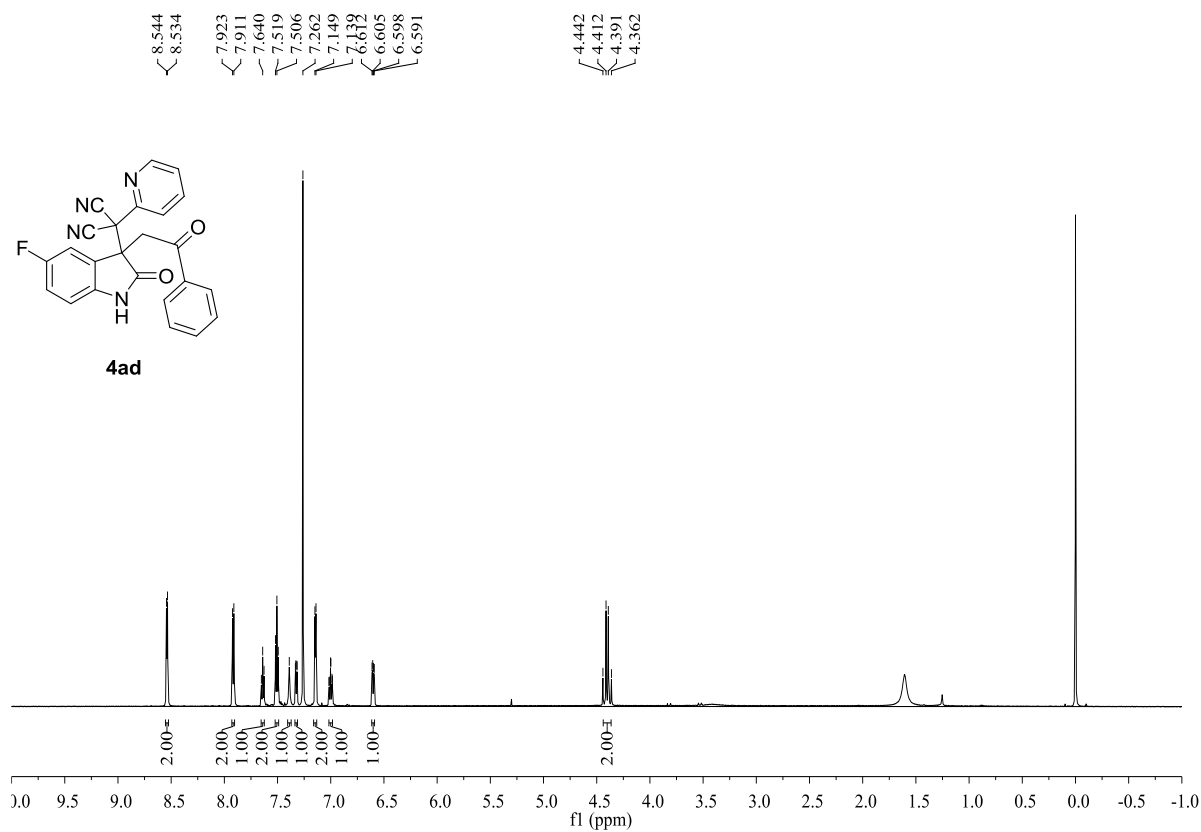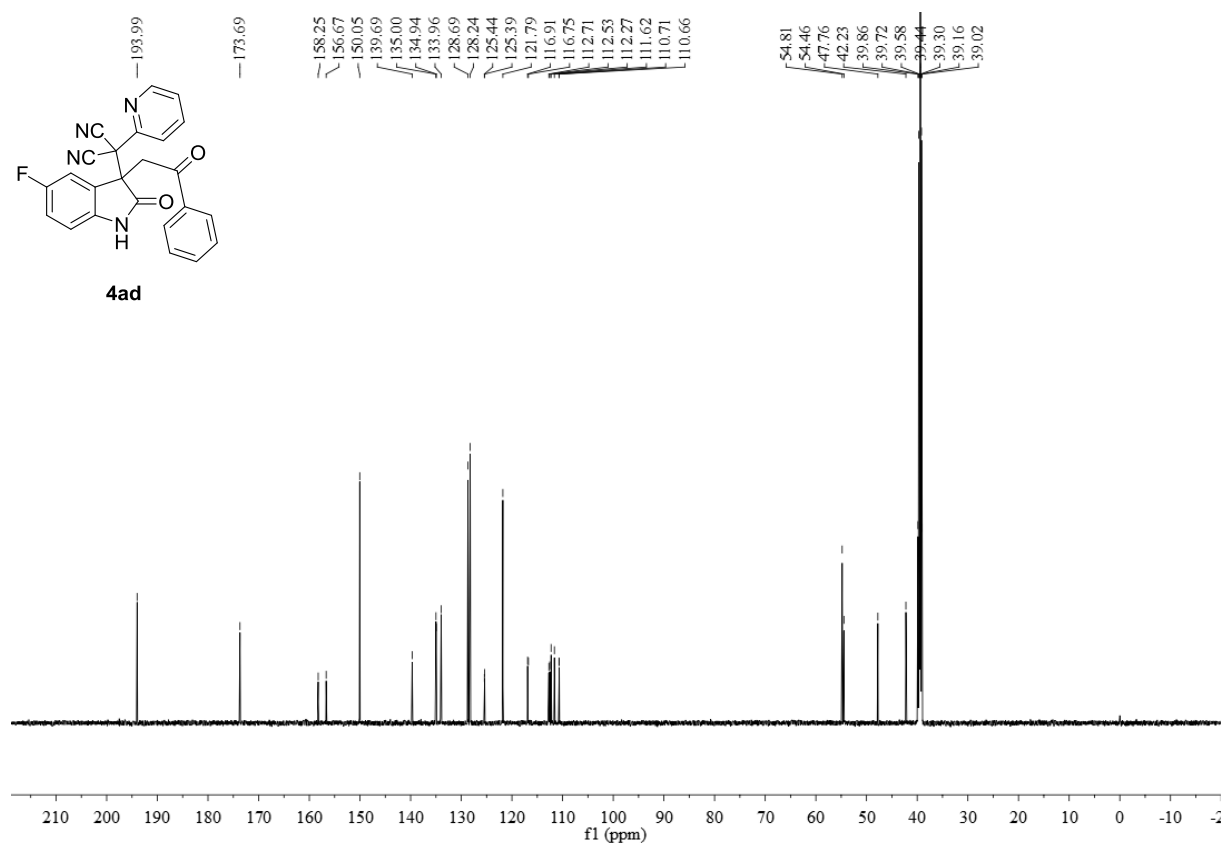

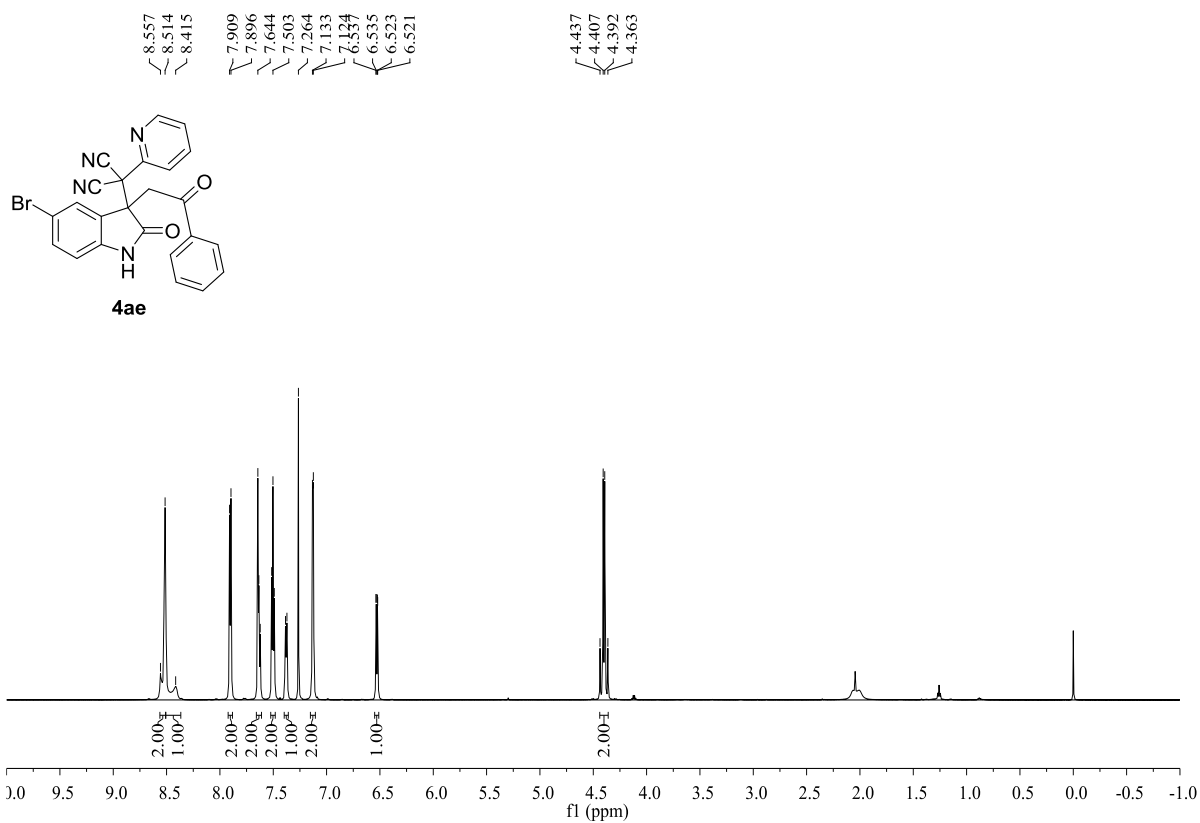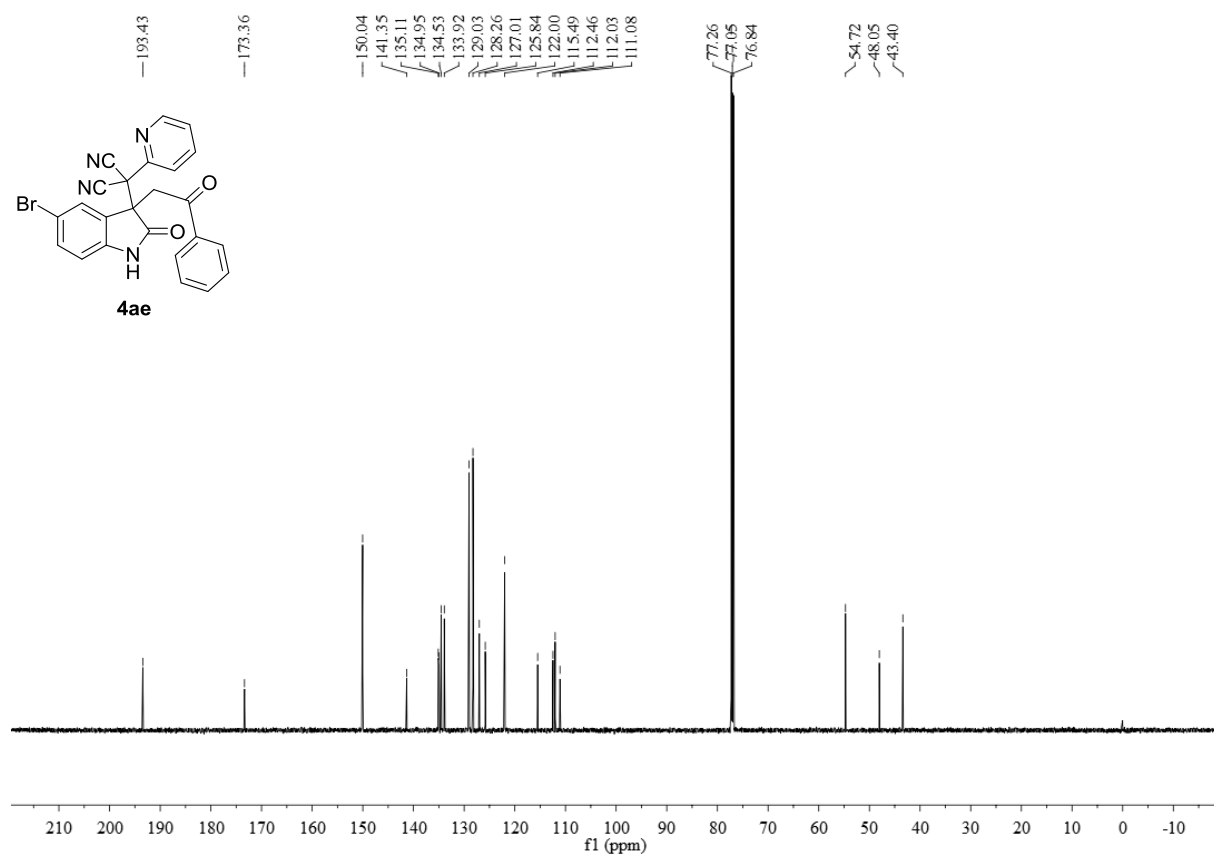

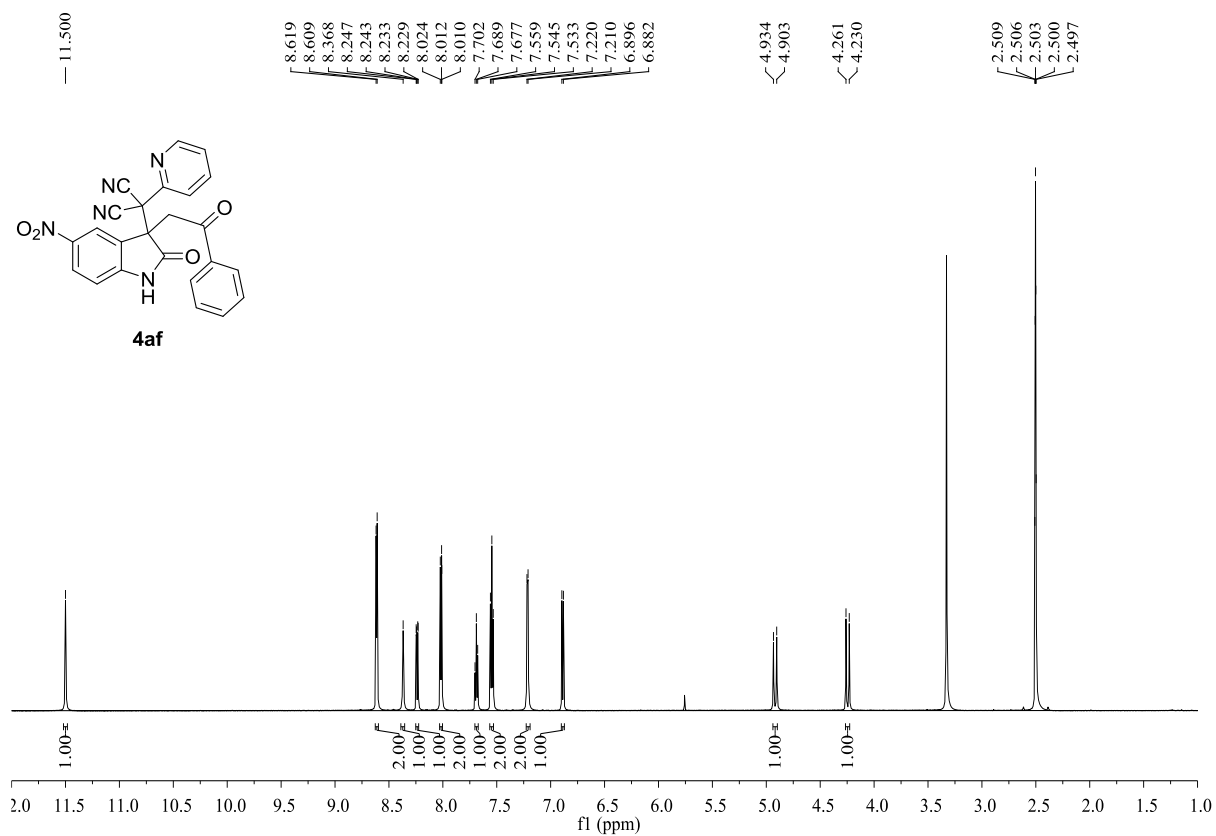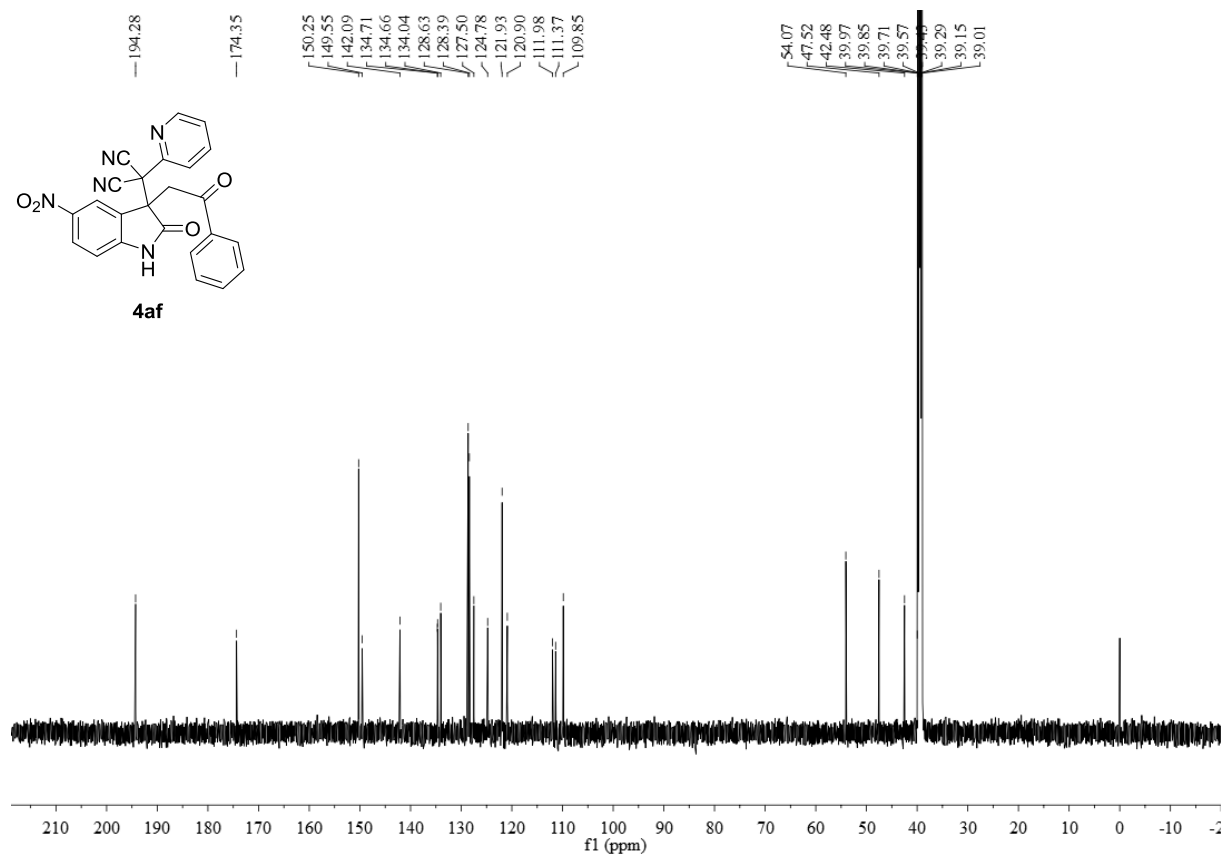

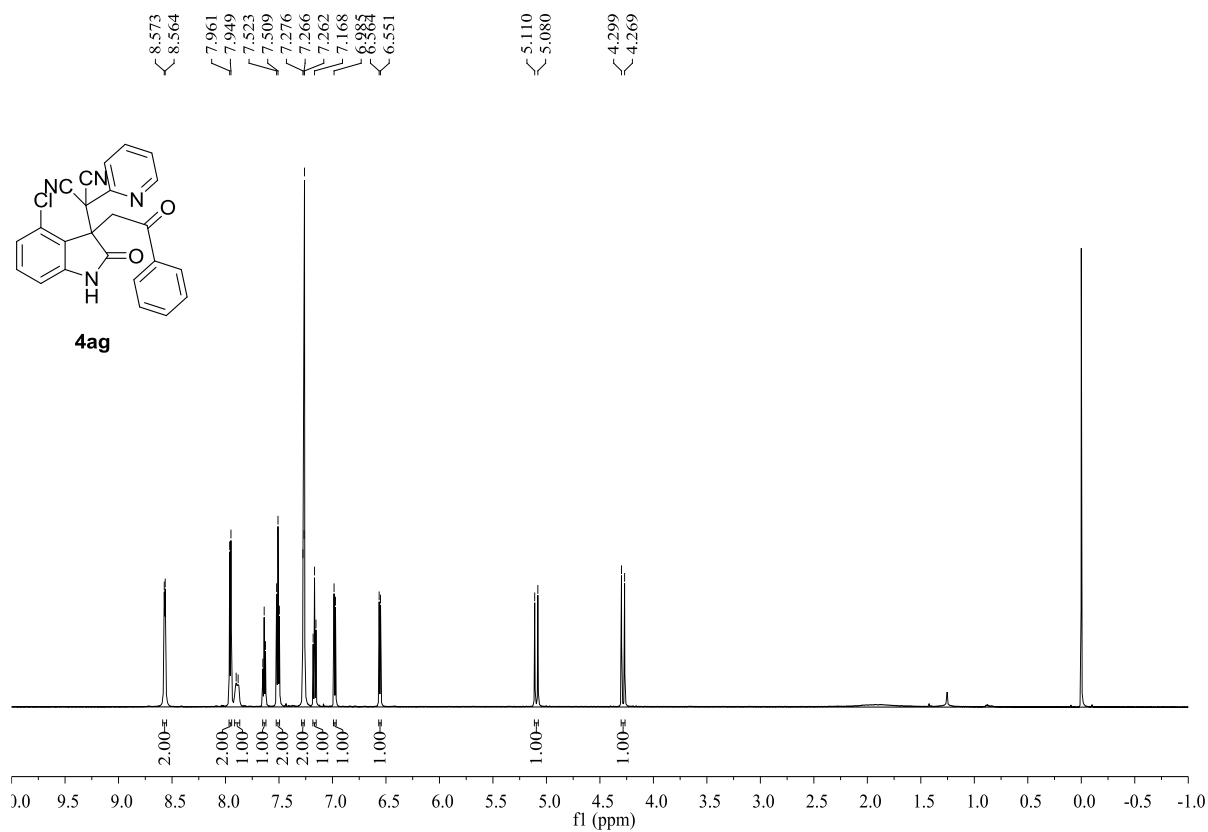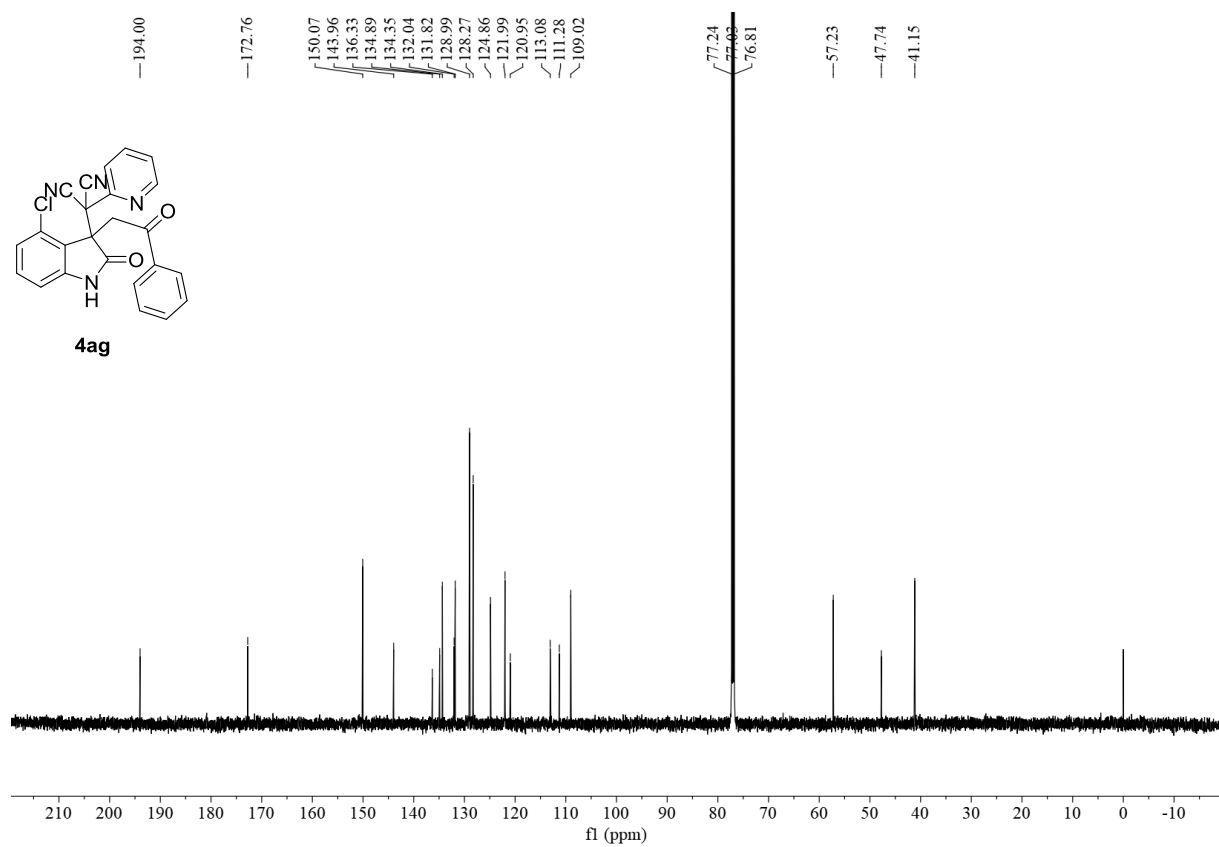

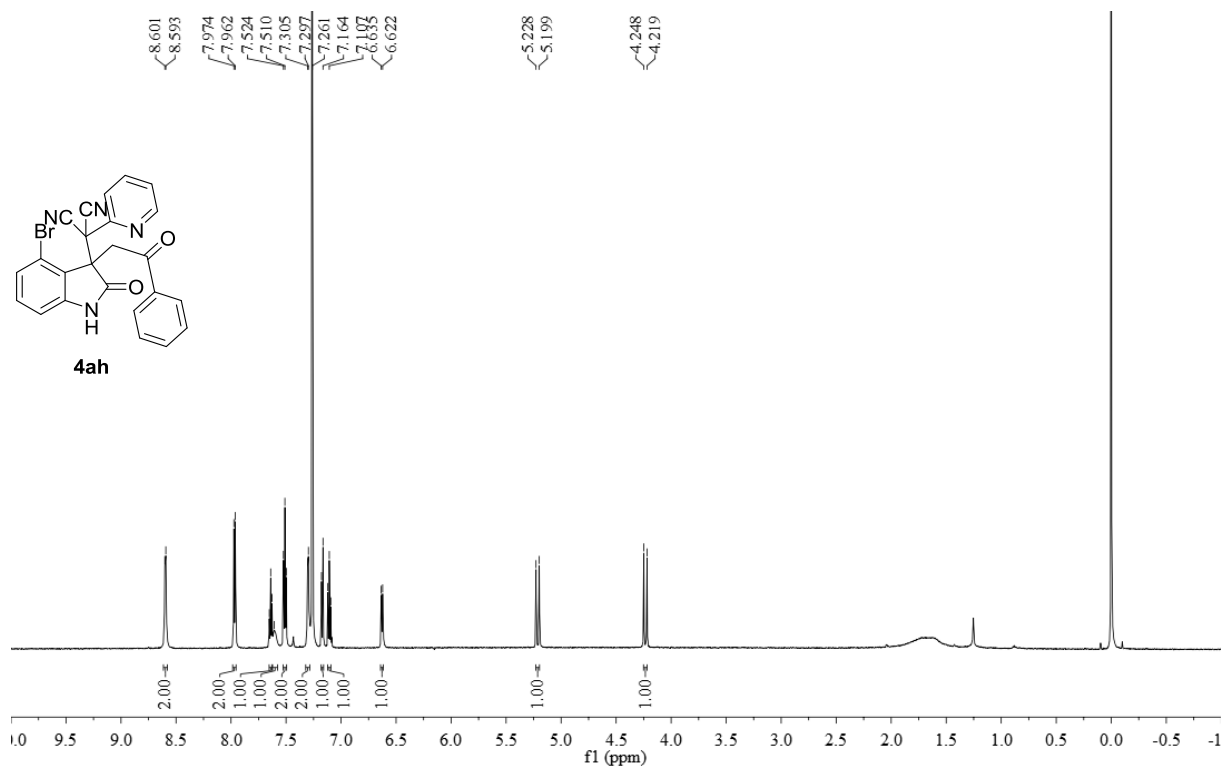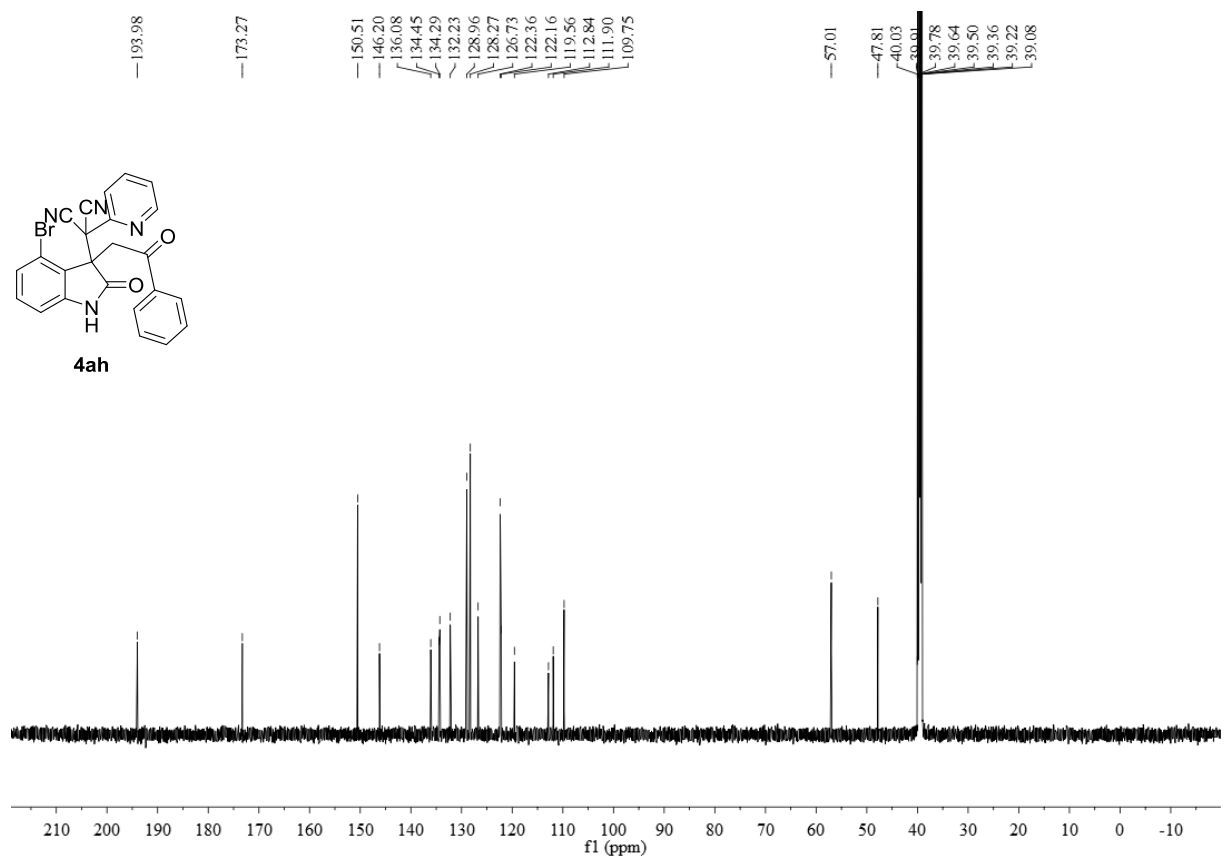

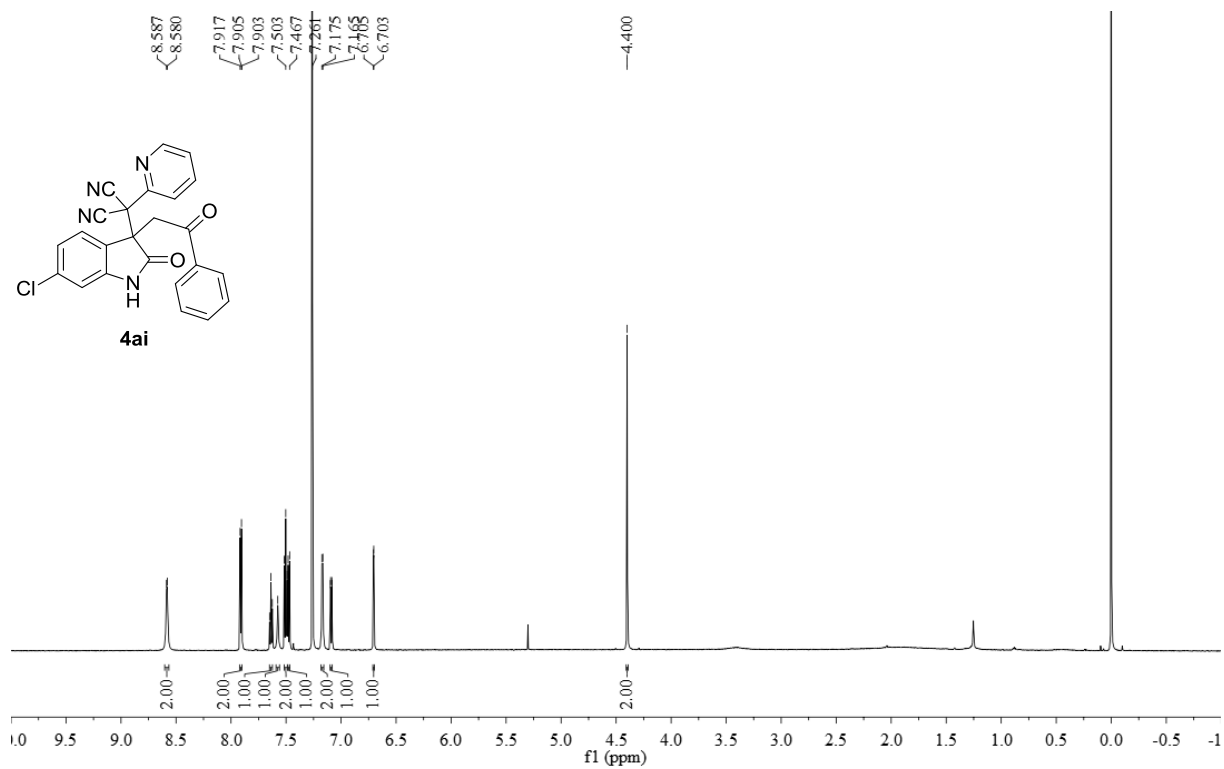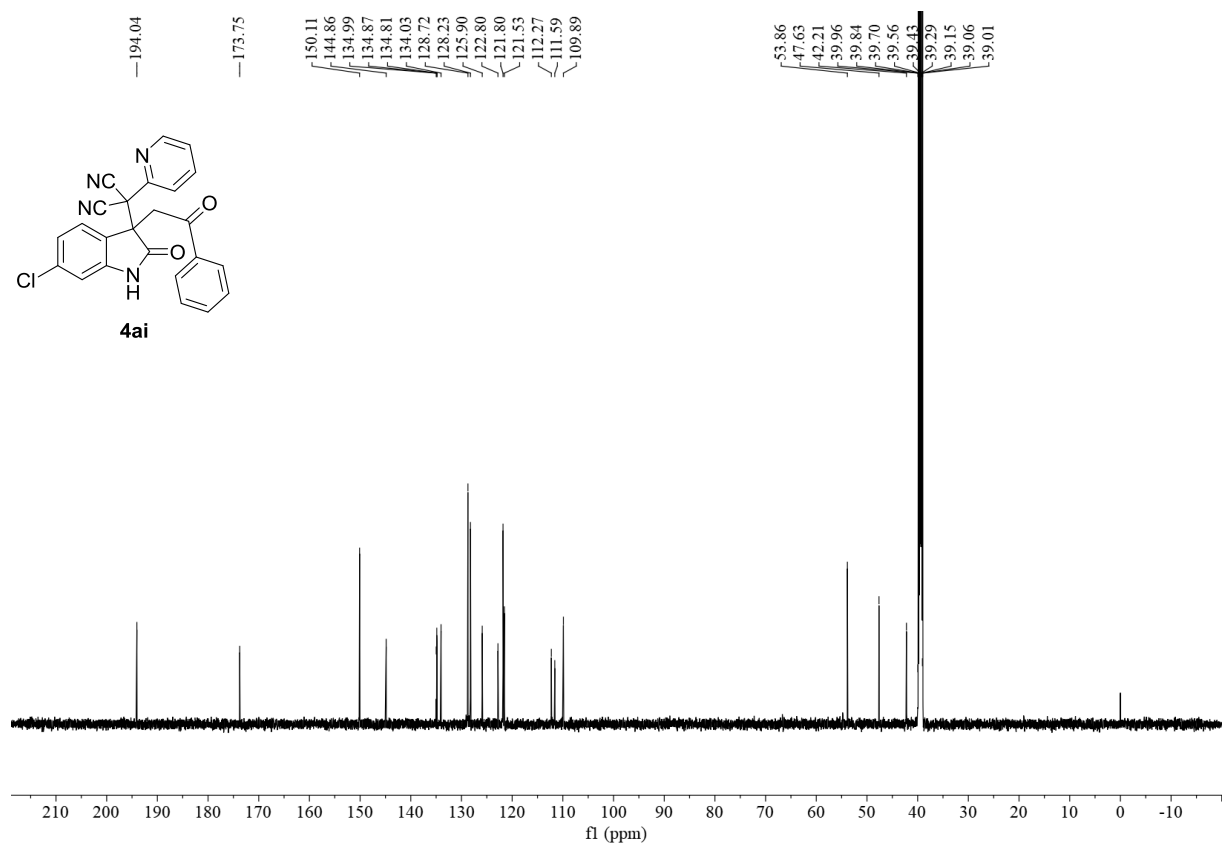



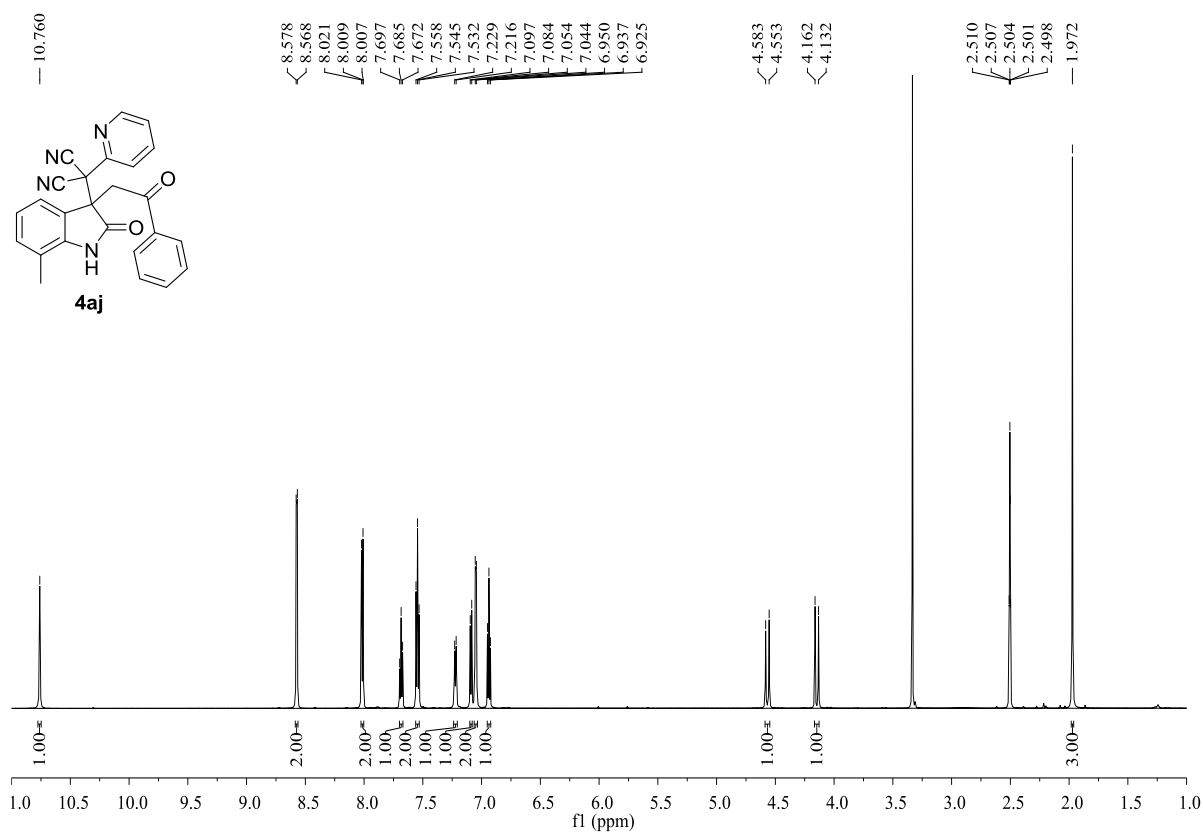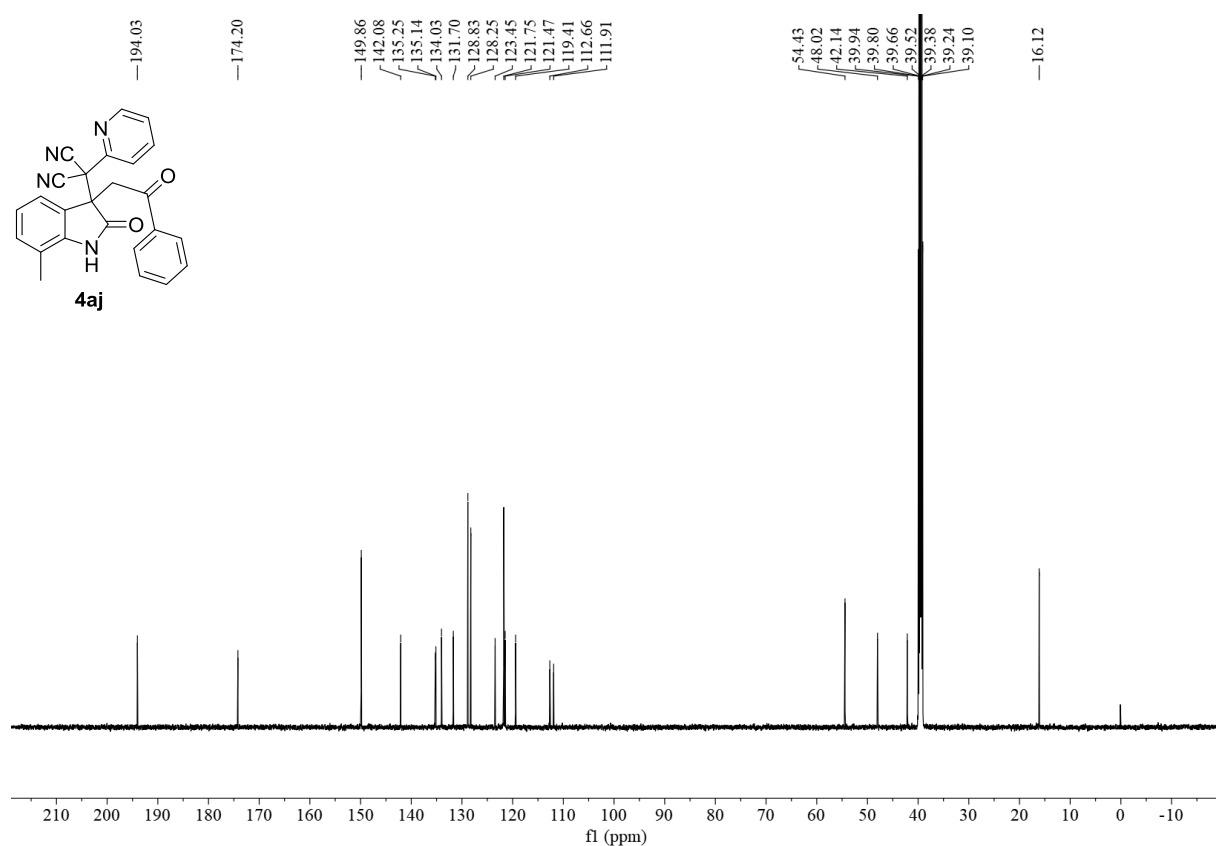

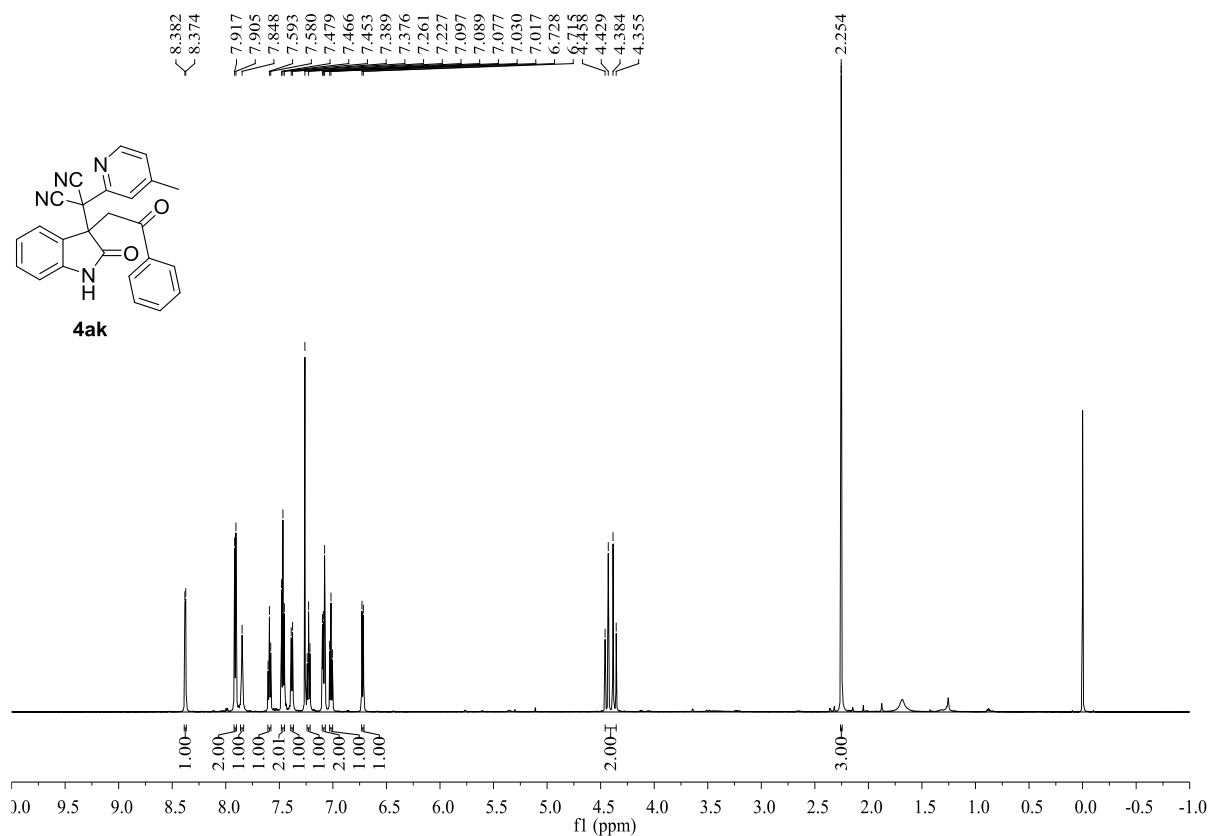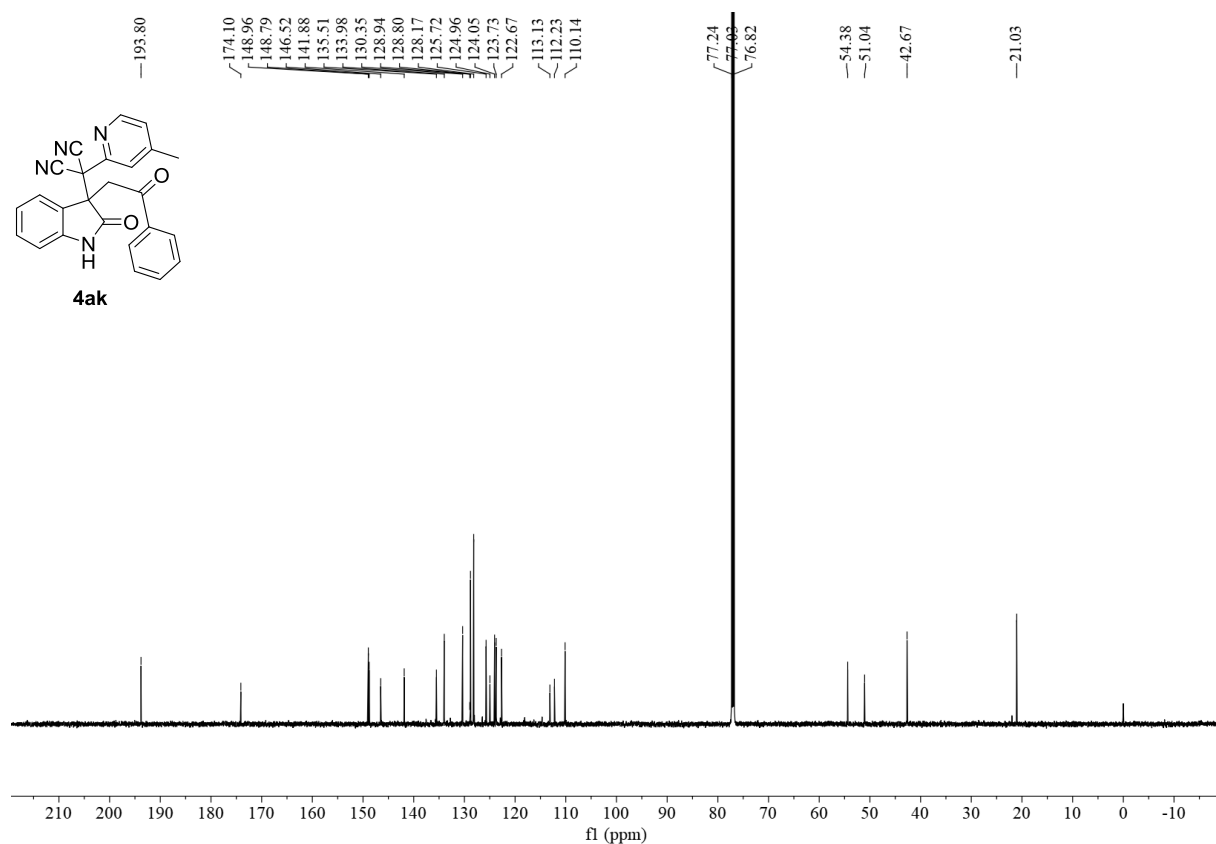

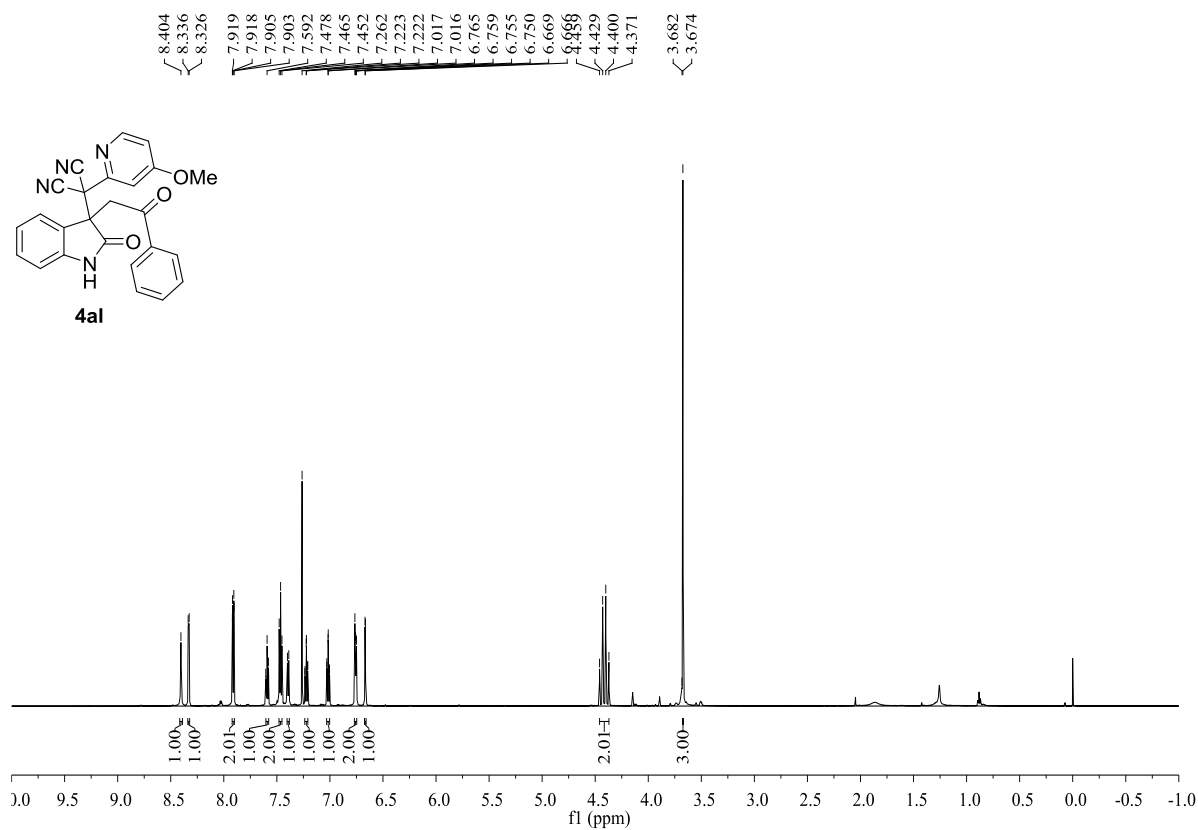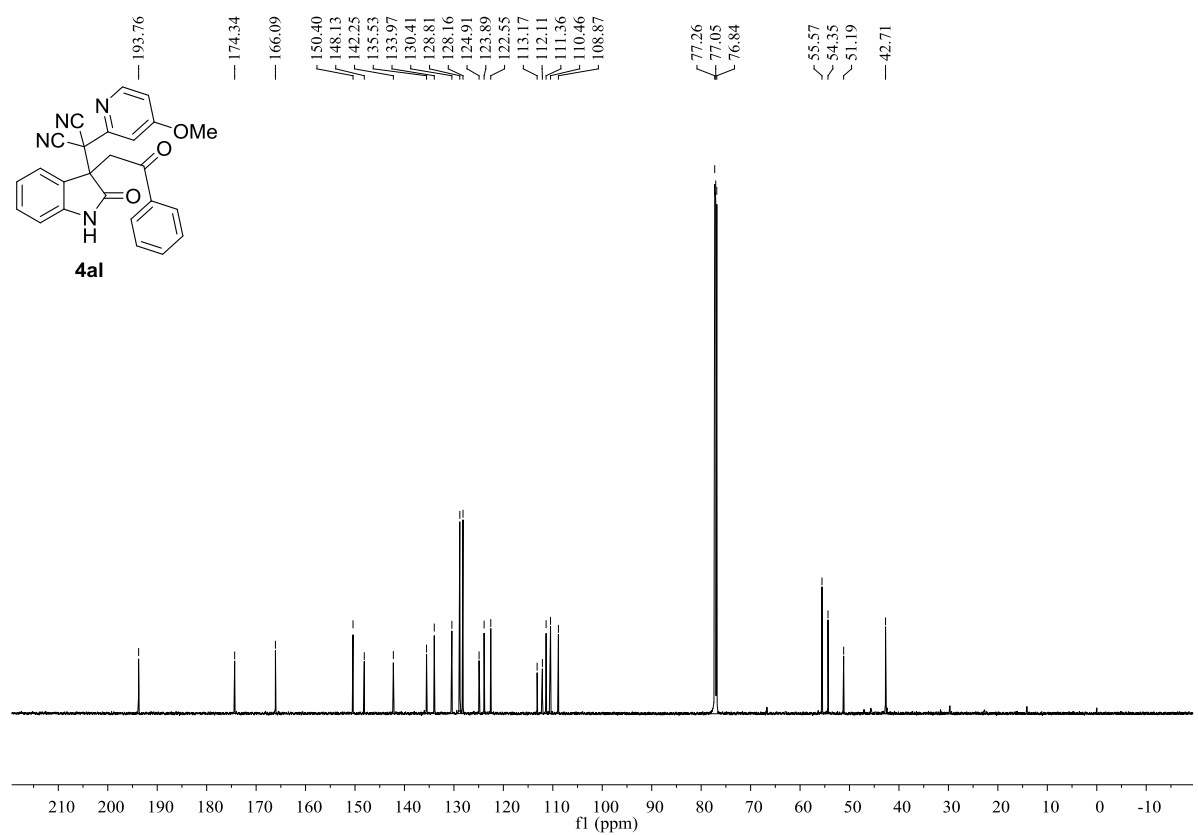

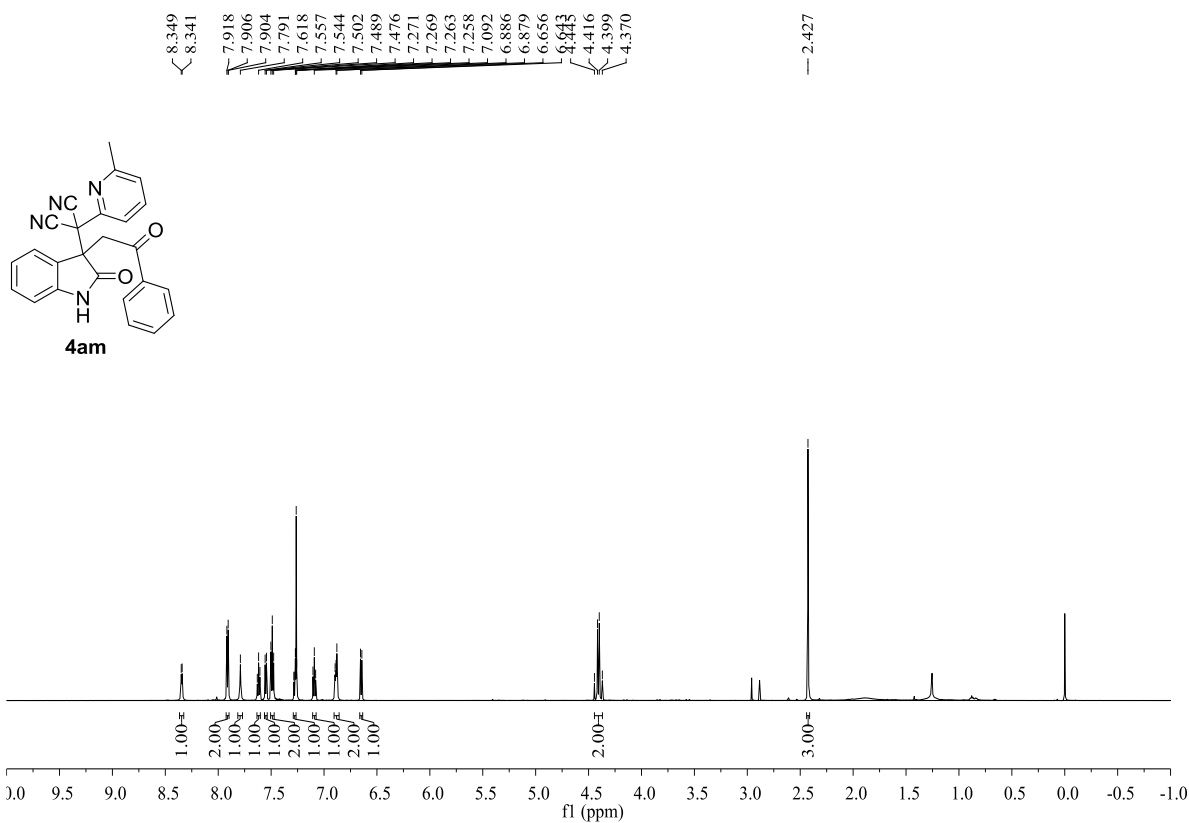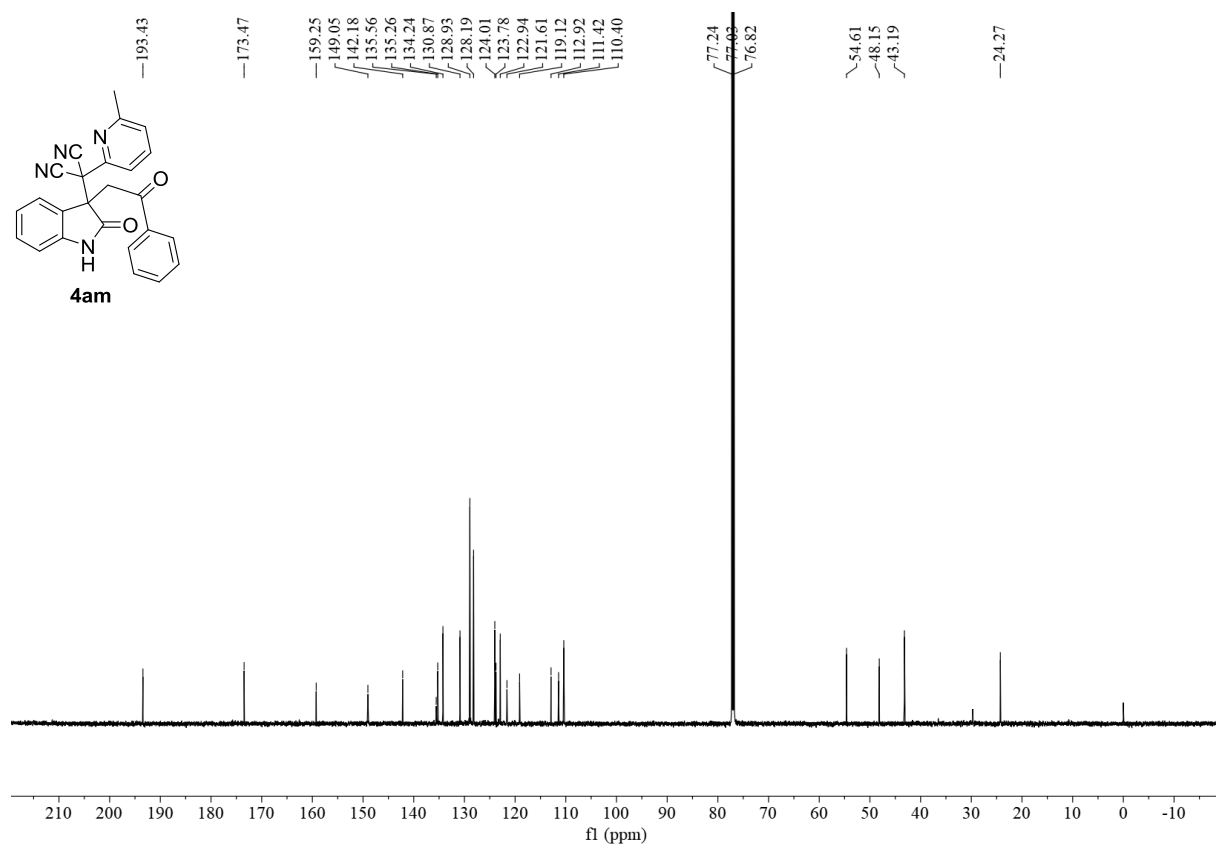



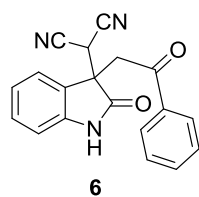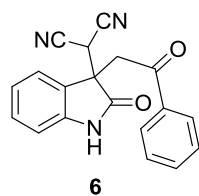

Supplement: d5ob01772f1.pdf [file d5ob01772f1.pdf]
